# Supplementary material
Source: bioRxiv or medRxiv preprint supplement (https://www.biorxiv.org/highwire/filestream/109612/field_highwire_adjunct_files/0/362327-1.pdf)
Supplement: Supplementary file [file 362327-1.pdf]

## Supplementary Methods

### General microbiology and molecular biology

Lysogeny Broth (LB) powder, agar, salts, sugars, growth supplements, antibiotics and inducers were all purchased from Sigma-Aldrich. Bacteria were cultured in LB, unless otherwise stated. Liquid LB was the standard Lennox formulation, except for when blasticidin-S was included, in which case the Luria low-salt formulation (0.5 g/L NaCl) was used. LB-agar always contained the Luria low-salt formulation. M9 base medium consisted of 1X M9 salts supplemented with 1mM MgSO<sub>4</sub> and 100 µM CaCl<sub>2</sub>. Unless otherwise stated, L-arabinose was used at a concentration of 0.03% w/v. Ampicillin (amp) was used at 100 µg/ml, chloramphenicol (cm) at 10 µg/ml, streptomycin (str) at 50 µg/ml, blasticidin-S (bsd) at 100 µg/ml and erythromycin (erm) at 20 µg/ml. Bacterial cultures were grown at 37°C (with shaking at 200 rpm for liquid cultures; Multitron, Infors HT), unless otherwise stated, and culture stocks were stored at -80°C in LB with 40% glycerol. For electroporation, DNA was added to 50 µl homemade electro-competent cells (unless otherwise stated), transferred to a 1mm-gap electroporation cuvette (VWR) and submitted to a pulse of 1,800 V (Electroporator 2510, Eppendorf). Cells were immediately transferred to fresh LB for recovery at 37°C (unless otherwise stated) with shaking for 30-90 minutes, before being plated on the appropriate selective media and left to grow overnight.

All enzymes and molecular biology reagents were purchased from NEB, unless otherwise stated. Primers were purchased from IDT or Eurofins, and designed with the help of Primer3<sup>57</sup>. For sensitive applications like barcoding and NGS library preparation, primers were ordered HPLC-purified, otherwise they were ordered desalted. UltraPure agarose was

supplied by Invitrogen, and all agarose gels were stained with SYBR Safe (Thermo Scientific) and visualised with a GelDoc XR+ imager (Bio-Rad). The GeneRuler 1kb Plus ladder (Thermo Scientific) was used for DNA fragment size estimation.

All plasmids used in this study, excluding the mutant library, are detailed in Supplementary Table 1. DNA fragments used in cloning are detailed in Supplementary Table 2. Primers, excluding those used for promoter mutagenesis, are provided in Supplementary Table 3. All strains are detailed in Supplementary Table 4. Primers used in promoter mutagenesis are provided in Supplementary Table 5.

## **Plasmid construction**

The DNA fragments used to construct pKH1503a, pKH1511c and pKH1511d come from either PCR amplification or from direct restriction digestion of purified plasmid DNA, and were joined by either standard restriction-ligation or by Gibson Assembly<sup>58</sup> (in which case, overlaps of ~40 nucleotides were used). PCR amplifications were all performed with Phusion Hot Start II High-Fidelity DNA Polymerase (Thermo Scientific) in its High-Fidelity buffer, following the manufacturer's recommendations. Restriction enzymes were used according to the manufacturer's instructions. When found necessary to reduce the occurrence of false-positive colonies, DNA was treated with calf intestinal alkaline phosphatase (to reduce vector self-ligation) and/or DpnI (to digest PCR template). After PCR amplification and/or digestion, DNA fragments were either verified by electrophoresis and column-purified (QIAquick PCR Purification Kit, QIAGEN) or, when necessary, gel purified (QIAquick Gel Extraction Kit, Qiagen). Gel-purification was always followed by a 2<sup>nd</sup> clean-up (QIAquick PCR Purification Kit, QIAGEN) to improve DNA quality for ligation. For gel extractions, agarose gels were stained with SYBR Safe (Thermo Scientific), and DNA was visualised

with blue light to avoid UV-induced DNA damage (Blue Transilluminator, Pearl Biotech). A NanoDrop ND-1000 spectrophotometer (Thermo Scientific) was used to determine DNA concentration for all fragments prior to ligation/Gibson Assembly. Standard ligation and Gibson Assembly were performed using T4 ligase and Gibson Assembly Master Mix (NEB), respectively, according to the manufacturer's recommendations (T4 ligase was then inactivated by heating at 65°C for 10 mins). In both cases, DNA was subsequently microdialysed against water for > 30 mins (MF-Millipore, Merck), and 1-5 µl were electroporated into 50 µl electrocompetent cells. DH5α  $\Delta araBA$  was used as the cloning strain except when the plasmid was pir-dependent, in which case PIR1 was used. After electroporation, cells were recovered in 1 ml LB for 30-90 mins at 37°C with shaking at 200 rpm, plated on LB-agar in the presence of the antibiotic indicated in Supplementary Table 1 and incubated overnight at 37°C. Plasmid DNA was purified from several colonies (QIAquick PCR Purification Kit, QIAGEN) and verified by both restriction analysis and Sanger sequencing of the insert region.

### **Strain engineering/adaptation**

Details of the final library host strain, and all intermediates used in its creation, are provided in Supplementary Table 4. Gene knockouts were performed using the method of Datsenko and Wanner<sup>46</sup>. The relevant strain was made electrocompetent, electroporated with 10 ng plasmid pKD46 DNA, and transformants were selected on LB-agar with 100 µg/ml ampicillin at 30°C. Several colonies were then re-isolated under the same conditions. The *cat* chloramphenicol-resistance cassette was PCR-amplified from pKD3<sup>46</sup> using primer pairs KO-araBA-fwd/KO-araBA-rev for *araBA*, KO-lacIZYA-fwd/KO-lacIZYA-rev for *lacIZYA* and KO-fucK-fwd/KO-fucK-rev for *fucK*, and a 2:1 mix of GoTaq/Pfu DNA polymerases

74 (Promega). PCR products were verified by 1% agarose gel electrophoresis, column-purified  
75 (QIAquick PCR Purification Kit, QIAGEN) and spectrophotometrically quantified  
76 (NanoDrop ND-1000). A pre-culture of a single pKD46-transformed colony was grown  
77 overnight (LB-amp) at 30°C and then diluted 100x into LB-amp with 0.2% L-arabinose and  
78 grown at 30°C to an OD<sub>600nm</sub> of ~0.7 (BioMate 3S, Thermo Scientific; 3-5 hours). The  
79 culture was made electrocompetent, electroporated with ~200 ng of the purified PCR product,  
80 and recombinants were selected on LB-agar with 10 µg/ml chloramphenicol at 37°C, for  
81 curing of pKD46. Several colonies were then re-isolated under the same conditions, and  
82 tested in parallel for pKD46 curing by plating on LB-amp and checking for colonies after an  
83 overnight growth at 30°C. Several of the re-isolated colonies were verified by colony-PCR,  
84 using 3 primer pairs for each knockout<sup>46</sup>. The gene-specific primers are *verif-araBA*-  
85 *fwd/verif-araBA-rev* for *araBA*, *verif-lacIZYA-fwd/verif-lacIZYA-rev* for *lacIZYA* and *verif-*  
86 *fucK-fwd/verif-fucK-rev* for *fucK*, and the common *cat* primers are *c1* and *c2* from  
87 reference<sup>46</sup>. For each knockout, the 3 primer pairs were: gene-specific *fwd/gene-specific rev*,  
88 gene-specific *fwd/c1* and gene-specific *rev/c2*. GoTaq DNA polymerase (Promega) was used  
89 for amplification, following the manufacturer's recommendations, and PCR products were  
90 analysed by agarose gel electrophoresis (1.5%). In the case of *araBA* and *fucK*, we wished to  
91 retain function of the remaining genes in their respective operons, and so the *cat* cassette was  
92 removed as described in reference<sup>46</sup>. For this, a pre-culture of a single recombineered colony  
93 was grown overnight (LB-cm, 37°C) and then diluted 100x into LB-cm and grown at 37°C to  
94 an OD<sub>600nm</sub> of ~0.7 (BioMate 3S, Thermo Scientific; 2-4 hours). The culture was made  
95 electrocompetent, electroporated with 10 ng plasmid pCP20 DNA, and transformants were  
96 selected on LB-agar with 100 µg/ml ampicillin at 30°C. Several colonies were then re-  
97 isolated under the same conditions, and then again in the absence of ampicillin at 42°C, to  
98 cure pCP20<sup>46</sup>. Finally, several colonies were streaked in parallel on LB (37°C, purification),

LB-cm (37°C, verify *cat* loss) and LB-amp (30°C, verify pCP20 loss). The loss of the *cat* cassette through FRT recombination was verified molecularly for several clones by colony-PCR, using the same primer pairs and conditions described above for *cat* insertion verification. The PCR products resulting from amplification with the gene-specific primer pairs were also Sanger-sequenced (GATC; using the amplification primers) as a final verification.

Adaptations were performed as described in Supplementary Table 4. For the initial adaptation step, pre-cultures were grown overnight in LB, washed twice in an equal volume of M9, and 1 ml washed cells were diluted in 100 ml of the appropriate adaptation media. Once growth became apparent, cultures were serially transferred in a volume of 20 ml, being left to grow for ~24 hours between each transfer, at which point they were diluted ~100x into fresh media. After adaptation, colonies were isolated on agar plates containing the same media used for adaptation.

To cure the plasmid from MG1655  $\Delta araBA$  D-ara<sup>+/evo</sup>  $\Delta fucK$   $\Delta lacIZYA::cat$  D/L-ara<sup>evo</sup>, a pre-culture was grown overnight in LB-cm, and dilutions were plated on LB-cm with 2% ribitol and 200  $\mu$ M IPTG. IPTG induces *araBA* from the plasmid, and AraB converts ribitol to the toxic compound ribitol phosphate<sup>59</sup>, rendering plasmid-harboring cells unable to grow. Several colonies were tested and confirmed for plasmid loss by streaking on LB-str and by colony-PCR (primers oKH150401c/oKH150202d, GoTaq (Promega)), with comparison to control colonies grown in the absence of ribitol. The final plasmid-less host strain was also tested once more for its marker-less  $\Delta araBA$  and  $\Delta fucK$  deletions using colony-PCR (primer pairs *verif-araBA-fwd/verif-araBA-rev* and *verif-fucK-fwd/verif-fucK-rev*, as above).

## Library creation methods

123 To create the initial library, two promoter-containing primer sets, oPtetLib-fwd and oPlacLib-  
124 rev, were each pooled in equimolar quantity (Supplementary Table 5). These two primer  
125 pools were then used together at a concentration of 0.5  $\mu$ M each pool to PCR-amplify *bsd*  
126 from plasmid pKH1511d, using Phusion Hot Start II High-Fidelity DNA Polymerase  
127 (Thermo Scientific) in its High-Fidelity buffer, following the manufacturer's  
128 recommendations. Cycling conditions were: 98°C for 30 secs, followed by 35 cycles of 98°C  
129 for 10 secs, 60°C for 30 secs and 72°C for 15 secs, with a final extension step of 72°C for 2  
130 mins. PCR product quality was checked by agarose gel electrophoresis, after which the  
131 product was column-purified (QIAquick PCR Purification Kit, QIAGEN) and quantified with  
132 a NanoDrop ND-1000 spectrophotometer (Thermo Scientific). The purified product and  
133 plasmid pKH1511c were then both digested for 90 mins with XhoI and SacI-HF restriction  
134 enzymes (NEB CutSmart buffer), and digested DNA was again column-purified (QIAquick  
135 PCR Purification Kit, QIAGEN) and quantified with a NanoDrop ND-1000  
136 spectrophotometer. 70ng of the pKH1511c vector fragment was ligated in a 1:3 molar ratio  
137 with the *bsd*/promoter-containing insert in a total volume of 20  $\mu$ l. The ligation was carried  
138 out at 16°C overnight using T4 DNA ligase (NEB T4 DNA ligase reaction buffer), which  
139 was then deactivated by heating at 65°C for 10 mins. The ligate was microdialysed against  
140 water for 30 mins (MF-Millipore, Merck), after which several transformations were  
141 performed as follows: 3  $\mu$ l were electroporated into 50  $\mu$ l electrocompetent DH5 $\alpha$   $\Delta$ *araBA*  
142 cells; cells were recovered in 500  $\mu$ l low-salt (Miller) LB for 1 hour at 37°C with shaking at  
143 200 rpm, plated on LB-agar with 100  $\mu$ g/ml blasticidin-S and incubated overnight at 37°C.  
144 Colony-PCR and Sanger sequencing (GATC) of the mutated promoter region was performed  
145 on 4 of the resulting colonies as a preliminary test of library quality, and all 4 clones had a  
146 unique promoter genotype with a single base substitution in the target region of either one or  
147 both promoters, as expected. An estimated 40,000 colonies were scraped off the agar into

148 LB-glycerol (40%), and plasmid DNA was purified from a sample of this cell suspension  
149 (QIAprep Spin Miniprep Kit, Qiagen) after thorough mixing.

150 To barcode the plasmid library, primers oBarcodeBla-fwd and oBarcodeBla-rev  
151 (Supplementary Table 3) were used at a concentration 0.5  $\mu$ M each to PCR-amplify *bla* from  
152 plasmid pKD3<sup>46</sup>, using Phusion Hot Start II High-Fidelity DNA Polymerase (Thermo  
153 Scientific) in its High-Fidelity buffer, following the manufacturer's recommendations.

154 Cycling conditions were: 98°C for 30 secs, followed by 30 cycles of 98°C for 10 secs, 60°C  
155 for 30 secs and 72°C for 25 secs, with a final extension step of 72°C for 3 mins. PCR product  
156 quality was checked by agarose gel electrophoresis, after which the product was column-  
157 purified (QIAquick PCR Purification Kit, QIAGEN) and quantified with a NanoDrop ND-  
158 1000 spectrophotometer (Thermo Scientific). The purified product was then digested for 1  
159 hour with SpeI-HF restriction enzyme (NEB CutSmart buffer), while the purified plasmid  
160 library obtained above was digested for 1 hour with BstZ17I and SpeI-HF restriction  
161 enzymes (NEB CutSmart buffer). Digested DNA was again column-purified (QIAquick PCR  
162 Purification Kit, QIAGEN) and quantified with a NanoDrop ND-1000 spectrophotometer. 60  
163 ng of the digested library was ligated in a 1:4 molar ratio with the *bla*/barcode-containing  
164 insert in a total volume of 20  $\mu$ l. The ligation was carried out at 16°C overnight using T4  
165 DNA ligase (NEB T4 DNA ligase reaction buffer), which was then deactivated by heating at  
166 65°C for 10 mins. The ligate was microdialysed against water for 30 mins (MF-Millipore,  
167 Merck), after which several transformations were performed as follows: 1  $\mu$ l was  
168 electroporated into 15 $\mu$ l commercially-prepared ElectroMAX DH5 $\alpha$ -E electrocompetent cells  
169 (Invitrogen); cells were recovered in 500  $\mu$ l LB for 30 mins (to minimise cell replication) at  
170 37°C with shaking at 200rpm, plated on LB-agar with 100  $\mu$ g/ml ampicillin and incubated  
171 overnight at 37°C. The use of commercially prepared electrocompetent cells was necessary  
172 due to reduced cloning efficiency at this step, possibly due to the ligation reaction involving

blunt ends. Plasmid DNA was purified from 3 colonies (QIAquick PCR Purification Kit, QIAGEN) for Sanger sequencing (GATC) of the mutated promoter and barcode regions as a preliminary test of barcoding efficiency. All 3 colonies were found to possess a unique promoter genotype, as before, along with a unique, correctly-inserted barcode. An estimated 100,000 colonies were scraped off the agar into LB-glycerol (40%), and plasmid DNA was purified from a sample of this cell suspension (QIAprep Spin Miniprep Kit, Qiagen) after thorough mixing.

To move the barcoded plasmid library into the final host strain, while avoiding the creation of transformants harbouring multiple unique plasmids<sup>60</sup>, several transformations were performed as follows, with plasmid concentration kept fairly low: 5 ng of the purified barcoded plasmid library obtained above were electroporated into 50 µl electrocompetent MG1655  $\Delta araBA$  D-ara<sup>+/evo</sup>  $\Delta fucK$   $\Delta lacIZYA::cat$  D/L-ara<sup>evo</sup> cells; cells were recovered in 500 µl LB for 30 mins at 37°C with shaking at 200rpm, plated on LB-agar with 100 µg/ml ampicillin and incubated overnight at 37°C. An estimated 600,000 colonies were scraped off the agar into LB-glycerol (40%), and this cell suspension was aliquoted and stored at -80°C after thorough mixing.

## **Barcode-promoter association**

To first move barcodes closer to the promoter region, the purified barcoded plasmid library was digested for 90 mins with XhoI, Sall-HF and SphI restriction enzymes (NEB CutSmart buffer). The largest fragment (~5.5 kb), which contains the mutated promoters and the barcode, was gel-purified (QIAquick Gel Extraction Kit, Qiagen) using a 1% agarose gel and quantified with a NanoDrop ND-1000 spectrophotometer before being self-ligated. XhoI and Sall are isocaudamers, so they create complementary cohesive ends, but the sequence



197 resulting from ligation between these ends is no longer recognised by either enzyme (SphI  
198 cuts within the region being discarded, and was simply included to ease gel extraction of the  
199 desired fragment). Because of this, they can be included in the reaction mix during self-  
200 ligation of the purified fragment to help reduce intermolecular ligation (undesired  
201 intermolecular ligation events which recreate XhoI and SalI sites can be reversed, releasing  
202 the original monomers and so increasing the efficiency of the desired intramolecular ligation  
203 reaction<sup>44,61</sup>). Due to the inclusion of these restriction enzymes, the self-ligation reaction was  
204 carried out in a restriction enzyme buffer, with ATP added for ligase activity. Additionally,  
205 the concentration of DNA and ligase was substantially reduced compared to standard ligation  
206 reactions to further reduce the occurrence of intermolecular ligation. The self-ligation  
207 reaction mix thus consisted of: 1X NEB restriction buffer 2 supplemented with 100 µg/ml  
208 BSA and 1 mM ribo-ATP (NEB), 30 ng DNA, 1 U each of XhoI and SalI-HF and 800 U of  
209 T4 DNA ligase, in a total volume of 200 µl. Inspired by the strategy of reference<sup>61</sup>, the  
210 reaction was cycled 50 times between 37°C (restriction enzyme and ligase activity optimum)  
211 for 5 mins and 16°C (promote annealing of DNA termini) for 15 mins. A final 37°C  
212 incubation was carried out for 15 mins to promote digestion of any remaining XhoI and SalI  
213 sites, followed by one of 65°C for 20 minutes to inactivate all enzymes. The ligate was  
214 concentrated to ~20 µl using a SpeedVac concentrator (Savant DNA 120, Thermo Scientific)  
215 and then microdialysed against water for 90 mins (MF-Millipore, Merck). As a preliminary  
216 test of the success of this ligation step, a portion of the ligate was used in a transformation to  
217 allow isolation and sequencing of several re-circularised plasmids: 2 µl were electroporated  
218 into 50 µl electrocompetent DH5α *ΔaraBA* cells; cells were recovered in 500 µl LB for 30  
219 mins at 37°C with shaking at 200 rpm, plated on LB-agar with 100 µg/ml ampicillin and  
220 incubated overnight at 37°C; plasmid DNA was purified from 6 colonies (QIAquick PCR  
221 Purification Kit, QIAGEN) for Sanger sequencing (GATC) of the ligated region containing

the mutated promoters and barcode. All 6 clones were found to possess the expected linking sequence between promoters and barcode, and all plasmids were inferred to be monomeric due to the high Phred scores of the chromatograms (suggesting the presence of a single unique barcode on each re-circularised plasmid).

With the re-circularised DNA placing barcodes in proximity to their respective mutated promoters<sup>44</sup>, this region was then PCR-amplified in a 40 µl reaction using 25 ng of the ligated DNA as template and 0.6 µM each of primers oLinkBarcode-fwd and oLinkBarcode-rev (Supplementary Table 3). These primers contain adaptors for a 2<sup>nd</sup> PCR at their 5' extremities, followed by fully randomised hexamers added to increase amplicon diversity to facilitate MiSeq flow-cell clustering. KAPA HiFi HotStart ReadyMixPCR Kit (Kapa Biosystems) was used for amplification, under the following cycling conditions (cycle number was kept low to reduce PCR errors and artefacts): 95°C for 3 mins, followed by 15 cycles of 98°C for 20 secs, 60°C for 30 secs and 68°C for 30 secs, with a final extension step of 68°C for 2 mins. The amplicon (~0.9 kb) was gel-purified (QIAquick Gel Extraction Kit, Qiagen) using a 1.5% agarose gel and quantified fluorometrically (dsDNA HS Assay Kit with a QuBit 2.0, Thermo Scientific). A 2<sup>nd</sup> 40 µl PCR was then performed using 5 ng of this amplicon as template and 0.6 µM each of a P5 and P7 Nextera Index Kit primer (Illumina) to add Illumina adaptors and multiplexing indexes. KAPA HiFi HotStart ReadyMixPCR Kit (Kapa Biosystems) was again used for amplification, under the following cycling conditions (cycle number was again kept low): 95°C for 30 secs, followed by 12 cycles of 95°C for 10 secs, 55°C for 30 secs and 68°C for 30 secs, with a final extension step of 68°C for 5 mins. The amplicon library (~1 kb) was gel-purified (QIAquick Gel Extraction Kit, Qiagen) using a 1.5% agarose gel and a 20,000X dilution was quantified by qPCR using KAPA Library Quantification Kit for Illumina (Kapa Biosystems) on a LightCycler 480 (Roche), following the manufacturer's recommendations.

247 After 300nt paired-end MiSeq sequencing, reads were processed using the Mothur<sup>62</sup> (version  
248 1.37.6) software package *via* the following steps: reads were quality-filtered by size (>199  
249 bases), number of uncalled bases (<3 Ns) and length of the longest homopolymer stretch,  
250 another indicator of overall read quality (<9 bases). Entire P<sub>LtetO-1</sub> sequences were extracted  
251 from Read 1, and barcode sequences and entire P<sub>LlacO-1</sub> from Read 2, by Needleman  
252 alignment to reference sequences (default alignment parameters). Reads for which either the  
253 P<sub>LtetO-1</sub>, P<sub>LlacO-1</sub> or barcode region contained insertions or did not generate a full alignment  
254 with the reference were discarded. The Mothur Precluster algorithm was then used to cluster  
255 barcode sequences differing by a Hamming distance of 1, with the aim of correcting for PCR  
256 and sequencing errors (the potential barcode diversity is so high (> 1x10<sup>12</sup>) that the presence  
257 of immediately neighbouring sequences is very likely due to these errors (Extended Data  
258 Figure 2c)). The algorithm uses sequence abundance to decide the “true” (majority) sequence  
259 for each cluster, and to decide where a sequence clusters if it has >1 immediate neighbour.  
260 After de-gapping and re-grouping barcode sequences to account for any alignment  
261 ambiguities resulting from small deletions, barcode clusters were used to build a dictionary  
262 assigning each “true” barcode sequence to a P<sub>LtetO-1</sub> and P<sub>LlacO-1</sub> sequence. Due to a high rate  
263 of PCR-derived recombination<sup>63</sup> being observed (caused by the extensive homology between  
264 all fragments, and resulting in some molecules displaying incorrect barcode-promoter  
265 associations), a haplotype-based strategy was used for this step rather than one in which each  
266 nucleotide is considered independently as in reference<sup>44</sup>. This is because the small number of  
267 mutations expected to be present in each mutant (0-2) means that, at any particular position,  
268 the majority of molecules will possess the WT base. If the consensus P<sub>LtetO-1</sub> and P<sub>LlacO-1</sub>  
269 sequences attached to a particular barcode are computed by considering each nucleotide  
270 independently, a high recombination rate can thus result in mutant bases being assigned as  
271 the WT base. The haplotype-based strategy, executed in Python (v3.5), consists of the

following steps: for each barcode cluster (consisting of reads whose barcode sequences are identical to or the immediate neighbour of the inferred “true” barcode sequence), the associated complete  $P_{LtetO-1}$ - $P_{LlacO-1}$  concatenate sequences were grouped; the number of occurrences of each of these 108-nt  $P_{LtetO-1}$ - $P_{LlacO-1}$  sequences was tabulated; if the cluster contained more than 2 read pairs in total, the most abundant concatenate  $P_{LtetO-1}$ - $P_{LlacO-1}$  sequence is  $\geq 5x$  more abundant than the second-most abundant one, and the most abundant concatenate  $P_{LtetO-1}$ - $P_{LlacO-1}$  sequence contains no Ns (uncalled bases), then this  $P_{LtetO-1}$ - $P_{LlacO-1}$  sequence is assigned to the “true” barcode sequence for that cluster (else the cluster is discarded). This stringent requirement is aimed at reducing barcode-promoter misassignments caused by PCR and sequencing errors, PCR-derived recombination or intermolecular ligation during the first step of barcode-promoter association (see above), as well as to avoid any barcodes that may be linked to multiple promoter genotypes. Only barcodes associated to promoter genotypes for which the entire promoter regions contain no unexpected mutations were considered for further analysis.

### **Mutant library competition assays**

A sample of the frozen library cell stock was thawed and diluted in 200 ml of M9 + 0.5% casamino acids (with 100  $\mu$ g/ml ampicillin), in a 500 ml flask, for a final blank-subtracted  $OD_{600}$  of 0.12 (200  $\mu$ l read by Varioskan microplate reader, Thermo Scientific). This common starting-culture was recovered for ~3.5 hours at 37°C with shaking at 200 rpm, reaching an  $OD_{600}$  of 0.3, before being washed with 200 ml of M9 + 0.1% casamino acids. Washed cell pellets (each coming from 50 ml of the original culture) were resuspended directly in 100 ml of the different competition media, for an effective 2X dilution of the original culture ( $OD_{600}$  of ~0.15; flasks of competition media were always pre-warmed at

37°C to keep temperature constant and detect any contamination, with aTc, IPTG and ampicillin being added at the time of transfer to avoid degradation). These cultures were then acclimatised to their respective competition media for ~2.25 hours (37°C, 200 rpm), reaching an OD<sub>600</sub> of 0.23-0.28, to allow time for stable induction by aTc, IPTG and L-arabinose. These acclimatised cultures were taken as t<sub>0</sub>, and so plasmid DNA was purified from a 50 ml sample of each culture (QIAprep Spin Miniprep Kit, Qiagen) and quantified fluorometrically (dsDNA HS Assay Kit with a QuBit 2.0, Thermo Scientific) for eventual HiSeq sequencing of plasmid barcodes (the rest remaining after this and transfer was pelleted, resuspended in LB-40% glycerol and stored at -80°C as an archive). 3.2 ml of each culture was transferred to 100 ml fresh competition media (~32X dilution) and left to grow (37°C, 200 rpm) to an OD<sub>600</sub> of ~0.12 (3-4 mean generations). DNA was purified from a 50 ml sample of each culture (t<sub>1</sub>), as before, and 3.2 ml of each culture was again transferred to 100 ml of fresh competition media and left to grow to an OD<sub>600</sub> of ~0.12 (~5 mean generations). This procedure was repeated until t<sub>6</sub> (or t<sub>8</sub> in an initial experiment), for a total of ~29 mean generations of competition (or ~39), over which time the impact of *de novo* mutation appears low (Extended Data Figure 3). The precise number of mean generations between each sampling was calculated from OD<sub>600</sub> values and used for estimating fitness.

#### **Barcode-sequencing of competed mutant library**

At each selected time-point, 20 ng of purified plasmid DNA was PCR-amplified in a 40 µl reaction using 0.6 µM each of primers oBarcodeSeq-fwd and oBarcodeSeq-rev (Supplementary Table 3). These primers contain adaptors for a 2<sup>nd</sup> PCR at their 5' extremities, followed by fully randomised hexamers to increase amplicon diversity, as in *Barcode-promoter Association*. In this case, the randomised hexamers were also used to

320 detect PCR duplicates arising from the 2<sup>nd</sup> PCR<sup>45</sup>. KAPA HiFi HotStart ReadyMixPCR Kit  
321 (Kapa Biosystems) was used for amplification, under the following cycling conditions (cycle  
322 number was kept low to reduce PCR errors and artefacts): 95°C for 3 mins, followed by 12  
323 cycles of 98°C for 20 secs, 60°C for 30 secs and 68°C for 30 secs, with a final extension step  
324 of 68°C for 2 mins. Amplicons (~200 bp) were gel-purified (QIAquick Gel Extraction Kit,  
325 Qiagen) using a 2% agarose gel and quantified fluorometrically (dsDNA HS Assay Kit with a  
326 QuBit 2.0, Thermo Scientific). A 2<sup>nd</sup> 40 µl PCR was then performed using 5-8 ng of each  
327 amplicon as template and 0.6 µM each of a P5 and P7 Nextera Index Kit primer (Illumina) to  
328 add Illumina adaptors and multiplexing indexes. KAPA HiFi HotStart ReadyMixPCR Kit  
329 (Kapa Biosystems) was again used for amplification, under the following cycling conditions:  
330 95°C for 3 mins, followed by 13 cycles of 98°C for 20 secs, 55°C for 30 secs and 68°C for 30  
331 secs, with a final extension step of 68°C for 5 mins. These ~300 bp amplicons, of the  
332 structure, P5 - i5 - N<sub>6</sub> PCR tag - N<sub>20</sub> plasmid barcode - N<sub>6</sub> PCR tag - i7 - P7, were gel-purified  
333 (QIAquick Gel Extraction Kit, Qiagen) using a 2% agarose gel and sent to IntegraGen (Evry,  
334 France) for qPCR-based quantification, equimolar pooling and 100nt paired-end HiSeq-4000  
335 sequencing (Illumina).

336 HiSeq sequencing reads were processed using the Mothur<sup>62</sup> (version 1.37.6) software  
337 package by the following steps: Forward and reverse reads were joined into contigs using  
338 Mothur's make.contigs command with the default parameters. Contigs were then quality-  
339 filtered by size (<131bp, as longer contigs imply forward and reverse reads could not be  
340 properly overlapped), number of uncalled bases (no Ns) and length of longest homopolymer  
341 stretch, an indicator of overall read quality (<9 bases). To remove the majority of PCR  
342 duplicates arising from the 2<sup>nd</sup> PCR (made possible by randomised hexamers introduced on  
343 each side of the barcode during the 1<sup>st</sup> PCR<sup>45</sup>), if a particular full contig was present more  
344 than once, only one copy was kept. Barcode sequences were then extracted after aligning

345 contigs to the reference sequence (Needleman global alignment). Reads containing insertions  
346 or not generating a full alignment with the reference were discarded. Next, the Mothur  
347 precluster algorithm was used to cluster barcode sequences differing by a Hamming distance  
348 of 1, with the aim of correcting for PCR and sequencing errors, as described in *Barcode-*  
349 *promoter association*. After de-gapping and re-clustering barcode sequences to account for  
350 any alignment ambiguities resulting from small deletions, the number of occurrences of each  
351 “true” barcode was tabulated across all time-points for each competition experiment. Finally,  
352 a custom R (v.3.4.3) script was used to merge these barcode counts tables with the barcode-  
353 promoter mutant dictionary generated in *Barcode-promoter association*.

| Plasmid name               | Description                                                                                                                                                                                                                                                                                                                                                                                                                                                                                                                                                                                                                                                                                                                                                                         | DNA fragments used for construction (this study) | Construction method / Supplier                                                                                                                                                                | Antibiotic used for selection | Accidental mutations / Sequence conflicts                                                                                                                                                           |
|----------------------------|-------------------------------------------------------------------------------------------------------------------------------------------------------------------------------------------------------------------------------------------------------------------------------------------------------------------------------------------------------------------------------------------------------------------------------------------------------------------------------------------------------------------------------------------------------------------------------------------------------------------------------------------------------------------------------------------------------------------------------------------------------------------------------------|--------------------------------------------------|-----------------------------------------------------------------------------------------------------------------------------------------------------------------------------------------------|-------------------------------|-----------------------------------------------------------------------------------------------------------------------------------------------------------------------------------------------------|
| pKD3 <sup>46</sup>         | PCR template plasmid for Datsenko-Wanner <sup>46</sup> gene deletion, containing a <i>cat</i> Cm-resistance cassette flanked by <i>FRT</i> sites and an R6Kγ <i>pir</i> -dependent <i>ori</i> . Also used as PCR template for <i>bla</i> amplification in library barcoding step                                                                                                                                                                                                                                                                                                                                                                                                                                                                                                    | -                                                | Lab stocks                                                                                                                                                                                    | Cm                            | -                                                                                                                                                                                                   |
| pKD46 <sup>46</sup>        | Plasmid with L-arabinose-inducible λ Red expression cassette for Datsenko-Wanner <sup>46</sup> recombineering; temperature-sensitive <i>ori</i> (repA101ts) for easy curing                                                                                                                                                                                                                                                                                                                                                                                                                                                                                                                                                                                                         | -                                                | Lab stocks                                                                                                                                                                                    | Amp                           | -                                                                                                                                                                                                   |
| pCP20 <sup>46</sup>        | Plasmid with yeast <i>FLP</i> recombinase expression cassette for Datsenko-Wanner <sup>46</sup> resistance-gene excision; temperature-sensitive <i>ori</i> (repA101ts) for easy curing                                                                                                                                                                                                                                                                                                                                                                                                                                                                                                                                                                                              | -                                                | Lab stocks                                                                                                                                                                                    | Amp                           | -                                                                                                                                                                                                   |
| pSkunk3-BLA <sup>64</sup>  | Phagemid containing <i>p15A</i> and <i>f1 oris</i> , <i>bla</i> β-lactamase gene and <i>aadA1</i> Str/Sp-resistance gene. Used for backbone ( <i>f1</i> phage <i>ori</i> not exploited in this study)                                                                                                                                                                                                                                                                                                                                                                                                                                                                                                                                                                               | -                                                | A. Birgy                                                                                                                                                                                      | Str                           | -                                                                                                                                                                                                   |
| pZS4Int-1 <sup>37</sup>    | <i>pSC101 ori</i> , <i>lacI</i> and <i>tetR</i> repressor genes under constitutive promoters, <i>attP</i> phage λ attachment site and <i>aadA1</i> Str/Sp -resistance gene. Used for <i>lacI</i> and <i>tetR</i>                                                                                                                                                                                                                                                                                                                                                                                                                                                                                                                                                                    | -                                                | A. Decrulle and I. Matic                                                                                                                                                                      | Sp                            | G → C at +246 of <i>tetR</i> ORF, causing Lys82 → Asn82 (reported in other constructs, including reference <sup>65</sup> ); 2 small insertions between <i>tetR</i> stop codon and its T1 terminator |
| pKH1503a                   | pSkunk3-BLA backbone, with <i>bla</i> replaced by: <i>araBA</i> under P <sub>LacO-1</sub> inducible promoter <sup>37</sup> and <i>lacI</i> and <i>tetR</i> repressor genes under constitutive promoters <sup>37</sup>                                                                                                                                                                                                                                                                                                                                                                                                                                                                                                                                                               | pSkunk-bkb, aKH150312a, aKH150312b               | Gibson Assembly <sup>58</sup>                                                                                                                                                                 | Str                           | -                                                                                                                                                                                                   |
| pKH1503a <sup>evo</sup>    | Plasmid purified from a single colony (MG1655 Δ <i>araBA</i> D-ara <sup>+evo</sup> Δ <i>fucK</i> Δ <i>lacIZYA::cat</i> D/L-ara <sup>+</sup> [ <i>pKH1503a</i> <sup>evo</sup> ]) isolated after adaptation to alternating D- and L-arabinose. Sanger sequencing of <i>araBA</i> , <i>tetR</i> and <i>lacI</i> , along with their regulatory regions, revealed a single G → C substitution in the 2 <sup>nd</sup> <i>lacO1</i> operator (-23 from TSS, in notation of reference <sup>37</sup> ). This was found in 3/3 colonies tested from the evolved population, and was deliberately included in all future P <sub>LacO-1</sub> -containing plasmids of this study (it was found through growth and expression measurements to still allow titratable expression control by IPTG) | -                                                | Purified from a single colony isolated after MG1655 Δ <i>araBA</i> D-ara <sup>+evo</sup> Δ <i>fucK</i> Δ <i>lacIZYA::cat</i> [ <i>pKH1503a</i> ] adaptation to alternating D- and L-arabinose | Str                           | -                                                                                                                                                                                                   |
| pKH1511c                   | pKH1503a <sup>evo</sup> backbone (rather than pKH1503a backbone, to exploit any unseen adaptive mutations arising during adaptation), with P <sub>LacO-1</sub> - <i>araBA</i> replaced by <i>araA</i> and <i>araB</i> in divergent orientation and promoter-less, separated by <i>SacI</i> and <i>XhoI</i> restriction sites to allow easy insertion of divergent promoters                                                                                                                                                                                                                                                                                                                                                                                                         | aKH151120a, aKH151120b, aKH151120c               | Restriction-ligation                                                                                                                                                                          | Str                           | C → A substitution (synonymous) at +1638 of <i>araB</i> ORF                                                                                                                                         |
| pSW23T::attP <sup>66</sup> | <i>oriV<sub>R6Kγ</sub></i> ( <i>pir</i> -dependent replication), <i>attP</i> phage λ attachment site, <i>cat</i> Cm-resistance gene. Used for <i>pir</i> -dependent backbone to avoid template plasmid carryover during cloning                                                                                                                                                                                                                                                                                                                                                                                                                                                                                                                                                     | -                                                | A. Soler and D. Mazel                                                                                                                                                                         | Cm                            | -                                                                                                                                                                                                   |
| pBSK-BSD1                  | pBluescript SK phagemid containing <i>pUC</i> and <i>f1 oris</i> , <i>bsd</i> <sup>43</sup> Bsd-resistance cassette and <i>bla</i> β-lactamase gene. Used for <i>bsd</i>                                                                                                                                                                                                                                                                                                                                                                                                                                                                                                                                                                                                            | -                                                | A. Couce (gene synthesis by Epoch Life Science, Inc, TX, USA)                                                                                                                                 | Amp                           | -                                                                                                                                                                                                   |
| pKH1511d                   | pSW23T::attP with <i>bsd</i> <sup>43</sup> Bsd-resistance cassette inserted into multiple cloning site. Used to avoid plasmid carryover during future <i>bsd</i> cloning                                                                                                                                                                                                                                                                                                                                                                                                                                                                                                                                                                                                            | pSW23T::attP-bkb, aKH151126a                     | Gibson Assembly <sup>58</sup>                                                                                                                                                                 | Cm                            | -                                                                                                                                                                                                   |

**Supplementary Table 1. Plasmids used in this study.** Amp: ampicillin (100 µg/ml); Bsd: blasticidin; Cm: chloramphenicol (10 µg/ml); Spec: spectinomycin (50 µg/ml); Str: streptomycin (50 µg/ml)



| DNA fragment name | Description/Creation                                                                                                                                                                                                                                                                                                                                                         | PCR template or digested plasmid      | Primers used for PCR (blank if fragment comes directly from plasmid digestion) | Restriction enzymes used (either post-PCR or directly on plasmid) |
|-------------------|------------------------------------------------------------------------------------------------------------------------------------------------------------------------------------------------------------------------------------------------------------------------------------------------------------------------------------------------------------------------------|---------------------------------------|--------------------------------------------------------------------------------|-------------------------------------------------------------------|
| pSkunk-bkb        | pSkunk3 <sup>64</sup> backbone, containing <i>oris</i> and <i>aadA1</i> Str/Sp-resistance gene. Double-digest of pSkunk3-BLA <sup>64</sup> to excise <i>bla</i> , followed by gel-extraction of backbone fragment                                                                                                                                                            | pSkunk3-BLA <sup>64</sup>             | -                                                                              | EcoRV, SpeI                                                       |
| aKH150312a        | <i>lacI-tetR</i> constitutive expression cassette <sup>37</sup> ( <i>inc.</i> T1 terminator), with a downstream extension overlapping the SpeI extremity of pSkunk-bkb. PCR-amplification; overlap introduced on reverse primer                                                                                                                                              | pZS4Int-1 <sup>37</sup>               | oKH150312a, oKH150312b                                                         | -                                                                 |
| aKH150312b        | P <sub>LacO-1</sub> - <i>araBA</i> bicistronic cassette ( <i>inc.</i> BBa_B1002 artificial terminator (BioBrick Foundation)), with an upstream extension overlapping the EcoRV extremity of pSkunk-bkb and a downstream extension overlapping the upstream extremity of aKH150312a. PCR-amplification; overlaps, P <sub>LacO-1</sub> and BBa_B1002 all introduced on primers | <i>E. coli</i> K12 MG1655 genomic DNA | oKH150312c, oKH150312e                                                         | -                                                                 |
| aKH151120a        | pKH1503a <sup>evo</sup> backbone, containing <i>oris</i> , <i>aadA1</i> Str/Sp-resistance gene and <i>lacI-tetR</i> (P <sub>LacO-1</sub> - <i>araBA</i> removed), with a downstream extension containing an NcoI site. PCR-amplification; extension introduced on reverse primer                                                                                             | pKH1503a <sup>evo</sup>               | oKH150312a, oKH151120a                                                         | SphI, NcoI                                                        |
| aKH151120b        | <i>araB</i> coding region followed by BBa_B1004 artificial terminator (BioBrick Foundation), with an upstream extension containing SacI and XhoI restriction sites and a downstream extension containing an SphI restriction site. PCR-amplification; extensions and BBa_B1004 introduced on primers                                                                         | pKH1503a <sup>evo</sup>               | oKH151120b, oKH151120c                                                         | SacI, SphI                                                        |
| aKH151120c        | <i>araA</i> coding region followed by BBa_B1002 artificial terminator (BioBrick Foundation), with an upstream extension containing a SacI restriction site and a downstream extension containing an NcoI restriction site. PCR-amplification; extensions introduced on primers                                                                                               | pKH1503a <sup>evo</sup>               | oKH151120d, oKH151120e                                                         | SacI, NcoI                                                        |
| pSW23T::attP-bkb  | Linearised pSW23T::attP. Double-digest of pSW23T::attP at Multiple Cloning Site                                                                                                                                                                                                                                                                                              | pSW23T::attP <sup>66</sup>            | -                                                                              | SpeI, SacII                                                       |
| aKH151126a        | <i>bsd</i> Bsd-resistance cassette ( <i>inc.</i> T1 terminator), with an upstream extension overlapping the SacII extremity of pSW23T::attP-bkb and a downstream extension overlapping the SpeI extremity of pSW23T::attP-bkb. PCR-amplification; overlaps introduced on primers                                                                                             | pBSK-BSD1                             | oKH151126a, oKH151203a                                                         | -                                                                 |

**Supplementary Table 2. DNA fragments used for cloning in this study.**

| Primer name       | Sequence (5' -> 3')                                                                                                     |
|-------------------|-------------------------------------------------------------------------------------------------------------------------|
| oKH150202d        | ATGGCAGAAATTCGAAAGC                                                                                                     |
| oKH150312a        | GCGGCATGCATTTACGTTGA                                                                                                    |
| oKH150312b        | AGCGCGTCGGCCGGTCGAATGCATAAGCTTACTAAGTAGTGAGAGCGTTACCCGACAAAC                                                            |
| oKH150312c        | AGCCAGAAAACCGAATTTTGCTGGGTGGGCTAACGATATCAATTGTGAGCGGATAACAATTGACATTGTGAGCGGATAACAAGATACTG<br>AGCACACCCGTTTTTTGGATGGAGTG |
| oKH150312e        | TTTTGCACCATTCGATGGTGTCAACGTAAATGCATGCCGCGCGAAAAAACCCCGCCGAAGCGGGTTTTTTGCGTTAGCGACGAAACC<br>CGTAATAC                     |
| oKH150401c        | ATTCATTAATGCAGCTGGC                                                                                                     |
| oKH151120a        | TTTTTCCATGGGATATCGTTAGCCCACCCAG                                                                                         |
| oKH151120b        | TTTTTGAGCTCCACAGCTAACCTCGAGACCCGTTTTTTTGGATGGAGTG                                                                       |
| oKH151120c        | TTTTTGATGCCGCGCGGCAAAACCCCGCCGAAGCGGGTTTTTCGGCGTTATAGAGTCGCAACGGCCT                                                     |
| oKH151120d        | TTTTTGAGCTCTGCGACTCTATAAGGACACG                                                                                         |
| oKH151120e        | TTTTTCCATGGGCGAAAAAACCCCGCCGA                                                                                           |
| oKH151126a        | GATAAGCTTGATATCGAATTCCTGCAGCCCGGGGATCCACTAGTGCGGCCGCGTGAGCCAGTGTGACTCTAGT                                               |
| oKH151203a        | CGTTTTATTGATGCCTCTAGCACGCGTACCATGGAGCTCCACCGCGGATAGGAATTCACGCTAGGG                                                      |
| KO-araBA-fwd      | ACTCTCTACTGTTTCTCCATACCCGTTTTTTTGGATGGAGTGAAACGATGGTGTAGGCTGGAGCTGCTTC                                                  |
| KO-araBA-rev      | ATCAGGCGTTACATACCGGATGCGGCTACTTAGCGACGAAACCCGTAATACATATGAATATCCTCCTTAG                                                  |
| verif-araBA-fwd   | TTGCATCAGACATTGCCGTC                                                                                                    |
| verif-araBA-rev   | GTTGGCTTCTAATACCTGGCG                                                                                                   |
| KO-lacIZYA-fwd    | GTATGGCATGATAGCGCCCGGAAGAGAGTCAATTCAGGGTGGTGAATGTGGTGTAGGCTGGAGCTGCTTC                                                  |
| KO-lacIZYA-rev    | AGCGCAGCGTATCAGGCAATTTTATAATTTAACTGACGATTCAACTTTCATATGAATATCCTCCTTAG                                                    |
| verif-lacIZYA-fwd | GTGATGACTATCAACTGGCAC                                                                                                   |
| verif-lacIZYA-rev | CTATTGCTGGCAAGCTGGTG                                                                                                    |
| KO-fucK-fwd       | TCCGGCTACCGGGCCTGAACAAGCAAGAGTGGTTAGCCGGATAAGCAATGGTGTAGGCTGGAGCTGCTTC                                                  |
| KO-fucK-rev       | AAATTAACGGCGAAATGTTTTTCAGCATTTACACTTCTCTATAAATTCATATGAATATCCTCCTTAG                                                     |
| verif-fucK-fwd    | AACGCACCAACTCAACCTGG                                                                                                    |
| verif-fucK-rev    | TTGATGCGGATGATGTCAGG                                                                                                    |
| oBarcodeBla-fwd   | TTTTTACTAGTGCGCGCGCTCGACTTNNNNNATNNNNATNNNNATNNNNATCTTCAGATCCTCTACGCCGG                                                 |
| oBarcodeBla-rev   | TACACTCCGCTAGCGCTGATGTCCGGCGGTGCCAGGTGGCACTTTTCGGG                                                                      |
| oLinkBarcode-fwd  | TCGTCGGCAGCGTCAGATGTGTATAAGAGACAGNNNNNCGTGTCTTATAGAGTCGCAG                                                              |
| oLinkBarcode-rev  | GTCTCGTGGGCTCGGAGATGTGTATAAGAGACAGNNNNNNGTCCGGCTAGAGGATCTG                                                              |
| oBarcodeSeq-fwd   | TCGTCGGCAGCGTCAGATGTGTATAAGAGACAGNNNNNNGTGAACGCTCTCACTAGTGG                                                             |
| oBarcodeSeq-rev   | GTCTCGTGGGCTCGGAGATGTGTATAAGAGACAGNNNNNCAAGATCCGGCCACGATGC                                                              |
| c1 <sup>46</sup>  | TTATACGCAAGGCGACAAGG                                                                                                    |
| c2 <sup>46</sup>  | GATCTTCCGTCACAGGTAGG                                                                                                    |

| Strain name                                                                                                                                                            | Description/Usage                                                                                                                                                                                                                                                                                                                                                                                                                                                                                                                             | Genotype                                                                                                                                                                                              | Engineering method / Supplier                                                                                                                                                                                                     | Antibiotic / supplements used for selection / adaptation |
|------------------------------------------------------------------------------------------------------------------------------------------------------------------------|-----------------------------------------------------------------------------------------------------------------------------------------------------------------------------------------------------------------------------------------------------------------------------------------------------------------------------------------------------------------------------------------------------------------------------------------------------------------------------------------------------------------------------------------------|-------------------------------------------------------------------------------------------------------------------------------------------------------------------------------------------------------|-----------------------------------------------------------------------------------------------------------------------------------------------------------------------------------------------------------------------------------|----------------------------------------------------------|
| K12 MG1655                                                                                                                                                             | "Wildtype" laboratory strain                                                                                                                                                                                                                                                                                                                                                                                                                                                                                                                  | F <sup>-</sup> $\lambda'$ <i>ilvG rfb-50 rph-1</i>                                                                                                                                                    | A. Couce; Coli Genetic Stock Centre #6300                                                                                                                                                                                         | -                                                        |
| PIR1                                                                                                                                                                   | <i>pir</i> -expressing strain for cloning and maintenance of <i>pir</i> -dependent plasmids (thymidine auxotroph)                                                                                                                                                                                                                                                                                                                                                                                                                             | F <sup>-</sup> $\Delta$ <i>lac169 rpoS(am) robA1 creC510 hsdR514 endA recA1 uidA(<math>\Delta</math>MluI)::pir-116</i>                                                                                | A. Soler and D. Mazel                                                                                                                                                                                                             | Erm + dT                                                 |
| DH5 $\alpha$                                                                                                                                                           | Standard strain for plasmid cloning and maintenance                                                                                                                                                                                                                                                                                                                                                                                                                                                                                           | F <sup>-</sup> $\lambda'$ $\Phi$ 80 <i>lacZ</i> $\Delta$ M15 $\Delta$ ( <i>lacZYA-argF</i> ) U169 <i>recA1 endA1 hsdR17 (rK<sup>-</sup>, mK<sup>+</sup>) phoA supE44 thi-1 gyrA96 relA1</i>           | Lab stock                                                                                                                                                                                                                         | -                                                        |
| DH5 $\alpha$ $\Delta$ <i>araBA::cat</i>                                                                                                                                | Intermediate for construction of DH5 $\alpha$ $\Delta$ <i>araBA</i>                                                                                                                                                                                                                                                                                                                                                                                                                                                                           | DH5 $\alpha$ $\Delta$ <i>araBA::cat</i>                                                                                                                                                               | Datsenko-Wanner (pKD46) <sup>46</sup>                                                                                                                                                                                             | Cm                                                       |
| DH5 $\alpha$ $\Delta$ <i>araBA</i>                                                                                                                                     | Preliminary tests; used as alternative to DH5 $\alpha$ in this study                                                                                                                                                                                                                                                                                                                                                                                                                                                                          | DH5 $\alpha$ $\Delta$ <i>araBA::FRT</i>                                                                                                                                                               | Datsenko-Wanner (pCP20) <sup>46</sup>                                                                                                                                                                                             | -                                                        |
| MG1655 $\Delta$ <i>araBA::cat</i>                                                                                                                                      | Intermediate for construction of MG1655 $\Delta$ <i>araBA</i>                                                                                                                                                                                                                                                                                                                                                                                                                                                                                 | MG1655 $\Delta$ <i>araBA::cat</i>                                                                                                                                                                     | Datsenko-Wanner (pKD46) <sup>46</sup>                                                                                                                                                                                             | Cm                                                       |
| MG1655 $\Delta$ <i>araBA</i>                                                                                                                                           | Preliminary tests; intermediate for construction of MG1655 $\Delta$ <i>araBA</i> $\Delta$ <i>lacIZYA::cat</i> and MG1655 $\Delta$ <i>araBA</i> D- <i>ara</i> <sup>+evo</sup>                                                                                                                                                                                                                                                                                                                                                                  | MG1655 $\Delta$ <i>araBA::FRT</i>                                                                                                                                                                     | Datsenko-Wanner (pCP20) <sup>46</sup>                                                                                                                                                                                             | -                                                        |
| MG1655 $\Delta$ <i>araBA</i> $\Delta$ <i>lacIZYA::cat</i>                                                                                                              | Preliminary tests                                                                                                                                                                                                                                                                                                                                                                                                                                                                                                                             | MG1655 $\Delta$ <i>araBA::FRT</i> $\Delta$ <i>lacIZYA::cat</i>                                                                                                                                        | Datsenko-Wanner (pKD46) <sup>46</sup>                                                                                                                                                                                             | Cm                                                       |
| MG1655 $\Delta$ <i>araBA</i> D- <i>ara</i> <sup>+evo</sup>                                                                                                             | MG1655 $\Delta$ <i>araBA</i> derivative able to metabolise D-arabinose using genes of the <i>fuc</i> operon, due to a <i>fucR</i> mutation rendering the operon D-arabinose-inducible. Further adapted to D-arabinose for ~ 60 generations, and a single colony isolated. Intermediate for construction of MG1655 $\Delta$ <i>araBA</i> D- <i>ara</i> <sup>+evo</sup> $\Delta$ <i>fucK::cat</i>                                                                                                                                               | MG1655 $\Delta$ <i>araBA::FRT fucR</i> <sup>D-ara</sup> D- <i>ara</i> <sup>evo</sup>                                                                                                                  | Incubated in M9 + D-arabinose until visible growth (6 days). Then, serially transferred in M9 + D-arabinose for ~ 60 generations before isolation of a single colony (see refs. <sup>31-33</sup> )                                | D-arabinose                                              |
| MG1655 $\Delta$ <i>araBA</i> D- <i>ara</i> <sup>+evo</sup> $\Delta$ <i>fucK::cat</i>                                                                                   | Intermediate for construction of MG1655 $\Delta$ <i>araBA</i> D- <i>ara</i> <sup>+evo</sup> $\Delta$ <i>fucK</i>                                                                                                                                                                                                                                                                                                                                                                                                                              | MG1655 $\Delta$ <i>araBA::FRT fucR</i> <sup>D-ara</sup> D- <i>ara</i> <sup>evo</sup> $\Delta$ <i>fucK::cat</i>                                                                                        | Datsenko-Wanner (pKD46) <sup>46</sup>                                                                                                                                                                                             | Cm                                                       |
| MG1655 $\Delta$ <i>araBA</i> D- <i>ara</i> <sup>+evo</sup> $\Delta$ <i>fucK</i>                                                                                        | Intermediate for construction of MG1655 $\Delta$ <i>araBA</i> D- <i>ara</i> <sup>+evo</sup> $\Delta$ <i>fucK</i> $\Delta$ <i>lacIZYA::cat</i>                                                                                                                                                                                                                                                                                                                                                                                                 | MG1655 $\Delta$ <i>araBA::FRT fucR</i> <sup>D-ara</sup> D- <i>ara</i> <sup>evo</sup> $\Delta$ <i>fucK::FRT</i>                                                                                        | Datsenko-Wanner (pCP20) <sup>46</sup>                                                                                                                                                                                             | -                                                        |
| MG1655 $\Delta$ <i>araBA</i> D- <i>ara</i> <sup>+evo</sup> $\Delta$ <i>fucK</i> $\Delta$ <i>lacIZYA::cat</i>                                                           | Intermediate for construction of MG1655 $\Delta$ <i>araBA</i> D- <i>ara</i> <sup>+evo</sup> $\Delta$ <i>fucK</i> $\Delta$ <i>lacIZYA::cat</i> [pKH1503a]                                                                                                                                                                                                                                                                                                                                                                                      | MG1655 $\Delta$ <i>araBA::FRT fucR</i> <sup>D-ara</sup> D- <i>ara</i> <sup>evo</sup> $\Delta$ <i>fucK::FRT</i> $\Delta$ <i>lacIZYA::cat</i>                                                           | Datsenko-Wanner (pKD46) <sup>46</sup>                                                                                                                                                                                             | Cm                                                       |
| MG1655 $\Delta$ <i>araBA</i> D- <i>ara</i> <sup>+evo</sup> $\Delta$ <i>fucK</i> $\Delta$ <i>lacIZYA::cat</i> [pKH1503a]                                                | Intermediate for construction of MG1655 $\Delta$ <i>araBA</i> D- <i>ara</i> <sup>+evo</sup> $\Delta$ <i>fucK</i> $\Delta$ <i>lacIZYA::cat</i> D/L- <i>ara</i> <sup>evo</sup> [pKH1503a]                                                                                                                                                                                                                                                                                                                                                       | MG1655 $\Delta$ <i>araBA::FRT fucR</i> <sup>D-ara</sup> D- <i>ara</i> <sup>evo</sup> $\Delta$ <i>fucK::FRT</i> $\Delta$ <i>lacIZYA::cat</i> [pKH1503a]                                                | Plasmid transformation (electroporation)                                                                                                                                                                                          | Str                                                      |
| MG1655 $\Delta$ <i>araBA</i> D- <i>ara</i> <sup>+evo</sup> $\Delta$ <i>fucK</i> $\Delta$ <i>lacIZYA::cat</i> D/L- <i>ara</i> <sup>evo</sup> [pKH1503a <sup>evo</sup> ] | MG1655 $\Delta$ <i>araBA</i> D- <i>ara</i> <sup>+evo</sup> $\Delta$ <i>fucK</i> $\Delta$ <i>lacIZYA::cat</i> [pKH1503a] derivative adapted to alternating D- and L-arabinose in presence of 10 $\mu$ M IPTG for ~45 generations, and a single large colony isolated. Evolved plasmid (pKH1503a <sup>evo</sup> ) used as template for further plasmid constructs; intermediate for construction of MG1655 $\Delta$ <i>araBA</i> D- <i>ara</i> <sup>+evo</sup> $\Delta$ <i>fucK</i> $\Delta$ <i>lacIZYA::cat</i> D/L- <i>ara</i> <sup>evo</sup> | MG1655 $\Delta$ <i>araBA::FRT fucR</i> <sup>D-ara</sup> D- <i>ara</i> <sup>evo</sup> $\Delta$ <i>fucK::FRT</i> $\Delta$ <i>lacIZYA::cat</i> D/L- <i>ara</i> <sup>evo</sup> [pKH1503a <sup>evo</sup> ] | Incubated in M9 + 10 $\mu$ M IPTG + D-arabinose until visible growth (2 weeks). Then, serially transferred in M9 + 10 $\mu$ M IPTG + alternating D- and L-arabinose for ~45 generations before isolation of a single large colony | Alternating D- and L-arabinose (+ IPTG + Str)            |
| MG1655 $\Delta$ <i>araBA</i> D- <i>ara</i> <sup>+evo</sup> $\Delta$ <i>fucK</i> $\Delta$ <i>lacIZYA::cat</i> D/L- <i>ara</i> <sup>evo</sup>                            | Final engineered/adapted plasmidless host strain for barcoded promoter-mutant plasmid library; able to utilize L-arabinose in presence of plasmid-expressed AraA and AraB, and D-arabinose in presence of plasmid-expressed AraB                                                                                                                                                                                                                                                                                                              | MG1655 $\Delta$ <i>araBA::FRT fucR</i> <sup>D-ara</sup> D- <i>ara</i> <sup>evo</sup> $\Delta$ <i>fucK::FRT</i> $\Delta$ <i>lacIZYA::cat</i> D/L- <i>ara</i> <sup>evo</sup>                            | Plasmid curing                                                                                                                                                                                                                    | Ribitol <sup>59</sup> (+ IPTG + Cm)                      |

**Supplementary Table 4. *E. coli* strains used in this study.** Cm: chloramphenicol (10  $\mu$ g/ml); dT: thymidine (30  $\mu$ g/ml); Erm: erythromycin (20  $\mu$ g/ml); Str: streptomycin (50  $\mu$ g/ml); IPTG: isopropyl  $\beta$ -D-1-thiogalactopyranoside. For adaptation, D- and L-arabinose were present at 0.3% and 0.2% w/v, respectively.

| Primer name     | Sequence (5' -> 3')                                                                                                                    |
|-----------------|----------------------------------------------------------------------------------------------------------------------------------------|
| oPtetLib-fwd-1  | TTTTTGAGCTCGTGCTC <b>AGTATCT</b> CTATCACTGATAGGGAT <b>GTCA</b> <i>NT</i> CTCTATCACTGATAGGGAGGCGCGCCGTGAGCCAGTGT<br>GACTCTAGTAG         |
| oPtetLib-fwd-2  | TTTTTGAGCTCGTGCTC <b>AGTATCT</b> CTATCACTGATAGGGAT <b>GTCA</b> <i>NT</i> CTCTATCACTGATAGGGAGGCGCGCCGTGAGCCAGTGT<br>GACTCTAGTAG         |
| oPtetLib-fwd-3  | TTTTTGAGCTCGTGCTC <b>AGTATCT</b> CTATCACTGATAGGGAT <b>GTNA</b> <i>AT</i> CTCTATCACTGATAGGGAGGCGCGCCGTGAGCCAGTGT<br>GACTCTAGTAG         |
| oPtetLib-fwd-4  | TTTTTGAGCTCGTGCTC <b>AGTATCT</b> CTATCACTGATAGGGAT <b>GNCA</b> <i>AT</i> CTCTATCACTGATAGGGAGGCGCGCCGTGAGCCAGTGT<br>GACTCTAGTAG         |
| oPtetLib-fwd-5  | TTTTTGAGCTCGTGCTC <b>AGTATCT</b> CTATCACTGATAGGGAT <b>MTCA</b> <i>AT</i> CTCTATCACTGATAGGGAGGCGCGCCGTGAGCCAGTGT<br>GACTCTAGTAG         |
| oPtetLib-fwd-6  | TTTTTGAGCTCGTGCTC <b>AGTATCT</b> CTATCACTGATAGGGAT <b>NGTCA</b> <i>AT</i> CTCTATCACTGATAGGGAGGCGCGCCGTGAGCCAGTGT<br>GACTCTAGTAG        |
| oPtetLib-fwd-7  | TTTTTGAGCTCGTGCTC <b>AGTAT</b> <i>NT</i> CTATCACTGATAGGGAT <b>GTCA</b> <i>AT</i> CTCTATCACTGATAGGGAGGCGCGCCGTGAGCCAGTGT<br>GACTCTAGTAG |
| oPtetLib-fwd-8  | TTTTTGAGCTCGTGCTC <b>AGTAN</b> <i>CT</i> CTATCACTGATAGGGAT <b>GTCA</b> <i>AT</i> CTCTATCACTGATAGGGAGGCGCGCCGTGAGCCAGTGT<br>GACTCTAGTAG |
| oPtetLib-fwd-9  | TTTTTGAGCTCGTGCTC <b>AGTNT</b> <i>CT</i> CTATCACTGATAGGGAT <b>GTCA</b> <i>AT</i> CTCTATCACTGATAGGGAGGCGCGCCGTGAGCCAGTGT<br>GACTCTAGTAG |
| oPtetLib-fwd-10 | TTTTTGAGCTCGTGCTC <b>AGNAT</b> <i>CT</i> CTATCACTGATAGGGAT <b>GTCA</b> <i>AT</i> CTCTATCACTGATAGGGAGGCGCGCCGTGAGCCAGTGT<br>GACTCTAGTAG |
| oPtetLib-fwd-11 | TTTTTGAGCTCGTGCTC <b>ANTAT</b> <i>CT</i> CTATCACTGATAGGGAT <b>GTCA</b> <i>AT</i> CTCTATCACTGATAGGGAGGCGCGCCGTGAGCCAGTGT<br>GACTCTAGTAG |
| oPtetLib-fwd-12 | TTTTTGAGCTCGTGCTC <b>NGTAT</b> <i>CT</i> CTATCACTGATAGGGAT <b>GTCA</b> <i>AT</i> CTCTATCACTGATAGGGAGGCGCGCCGTGAGCCAGTGT<br>GACTCTAGTAG |
| oPlacLib-rev-1  | TTTTTCTCGAGGTGCTC <b>AGTATCT</b> TTGTTATCCGATCACAAT <b>GTCA</b> <i>NT</i> TGTTATCCGCTCACAATTATAGGAAC TTCACGCTAGGG                      |
| oPlacLib-rev-2  | TTTTTCTCGAGGTGCTC <b>AGTATCT</b> TTGTTATCCGATCACAAT <b>GTCA</b> <i>NT</i> TGTTATCCGCTCACAATTATAGGAAC TTCACGCTAGGG                      |
| oPlacLib-rev-3  | TTTTTCTCGAGGTGCTC <b>AGTATCT</b> TTGTTATCCGATCACAAT <b>GTNA</b> <i>AT</i> TGTTATCCGCTCACAATTATAGGAAC TTCACGCTAGGG                      |
| oPlacLib-rev-4  | TTTTTCTCGAGGTGCTC <b>AGTATCT</b> TTGTTATCCGATCACAAT <b>GNCA</b> <i>AT</i> TGTTATCCGCTCACAATTATAGGAAC TTCACGCTAGGG                      |
| oPlacLib-rev-5  | TTTTTCTCGAGGTGCTC <b>AGTATCT</b> TTGTTATCCGATCACAAT <b>MTCA</b> <i>AT</i> TGTTATCCGCTCACAATTATAGGAAC TTCACGCTAGGG                      |
| oPlacLib-rev-6  | TTTTTCTCGAGGTGCTC <b>AGTATCT</b> TTGTTATCCGATCACAAN <b>GTCA</b> <i>AT</i> TGTTATCCGCTCACAATTATAGGAAC TTCACGCTAGGG                      |
| oPlacLib-rev-7  | TTTTTCTCGAGGTGCTC <b>AGTAT</b> <i>MT</i> TGTTATCCGATCACAAT <b>GTCA</b> <i>AT</i> TGTTATCCGCTCACAATTATAGGAAC TTCACGCTAGGG               |
| oPlacLib-rev-8  | TTTTTCTCGAGGTGCTC <b>AGTAN</b> <i>CT</i> TTGTTATCCGATCACAAT <b>GTCA</b> <i>AT</i> TGTTATCCGCTCACAATTATAGGAAC TTCACGCTAGGG              |
| oPlacLib-rev-9  | TTTTTCTCGAGGTGCTC <b>AGTNT</b> <i>CT</i> TTGTTATCCGATCACAAT <b>GTCA</b> <i>AT</i> TGTTATCCGCTCACAATTATAGGAAC TTCACGCTAGGG              |
| oPlacLib-rev-10 | TTTTTCTCGAGGTGCTC <b>AGNAT</b> <i>CT</i> TTGTTATCCGATCACAAT <b>GTCA</b> <i>AT</i> TGTTATCCGCTCACAATTATAGGAAC TTCACGCTAGGG              |
| oPlacLib-rev-11 | TTTTTCTCGAGGTGCTC <b>ANTAT</b> <i>CT</i> TTGTTATCCGATCACAAT <b>GTCA</b> <i>AT</i> TGTTATCCGCTCACAATTATAGGAAC TTCACGCTAGGG              |
| oPlacLib-rev-12 | TTTTTCTCGAGGTGCTC <b>NGTAT</b> <i>CT</i> TTGTTATCCGATCACAAT <b>GTCA</b> <i>AT</i> TGTTATCCGCTCACAATTATAGGAAC TTCACGCTAGGG              |

**Supplementary Table 5. Forward and reverse primer sets for promoter mutagenesis.** -35 and -10 RNA polymerase-binding hexamers are in bold. N (italicised) denotes a mix of all 4 bases.

## Supplementary Table 6 (Excel file)

Mutant fitness estimates with their 95% bootstrap confidence intervals and the number of barcodes used for their estimation. Genotype nomenclature is [ $P_{\text{LtetO-1-araA}}$  mutation].[  $P_{\text{LlacO-1-araB}}$  mutation].

## Supplementary Table 7 (Excel file)

Parameter estimates for complete phenotype-fitness model. Prior bounds are provided (bold indicates bounds guided by expression measurements), along with the upper, lower and median estimates from the best 2.5% of Markov chains, and the estimates from the single best chain.

## References

57. Rozen, S. & Skaletsky, H. Primer3 on the WWW for General Users and for Biologist Programmers. *Methods Mol. Biol.* **132**, 365–386 (2000).
58. Gibson, D. G. *et al.* Enzymatic assembly of DNA molecules up to several hundred kilobases. *Nat. Methods* **6**, 343–345 (2009).
59. Katz, L. Selection of AraB and AraC Mutants of Escherichia coli B/r by Resistance to Ribitol. *J. Bacteriol.* **102**, 593–595 (1970).
60. Goldsmith, M., Kiss, C., Bradbury, A. R. M. & Tawfik, D. S. Avoiding and controlling double transformation artifacts. *Protein Eng. Des. Sel.* **20**, 315–318 (2007).
61. Pusch, C., Schmitt, H. & Blin, N. Increased cloning efficiency by cycle restriction–ligation (CRL). *Tech. Tips Online* **2**, 35–37 (1997).
62. Schloss, P. D. *et al.* Introducing mothur: Open-Source, Platform-Independent, Community-Supported Software for Describing and Comparing Microbial Communities. *Appl. Environ. Microbiol.* **75**, 7537–7541 (2009).
63. Meyerhans, A., Vartanian, J.-P. & Wain-Hobson, S. DNA recombination during PCR. *Nucleic Acids Res.* **18**, 1687–1691 (1990).
64. Firnberg, E. & Ostermeier, M. PFunkel: Efficient, Expansive, User-Defined Mutagenesis. *PLoS ONE* **7**, e52031 (2012).
65. Gossen, M. & Bujard, H. Tight control of gene expression in mammalian cells by tetracycline-responsive promoters. *Proc. Natl. Acad. Sci.* **89**, 5547–5551 (1992).
66. Pant, A. *et al.* Effect of LexA on Chromosomal Integration of CTX $\phi$  in *Vibrio cholerae*. *J. Bacteriol.* **198**, 268–275 (2016).

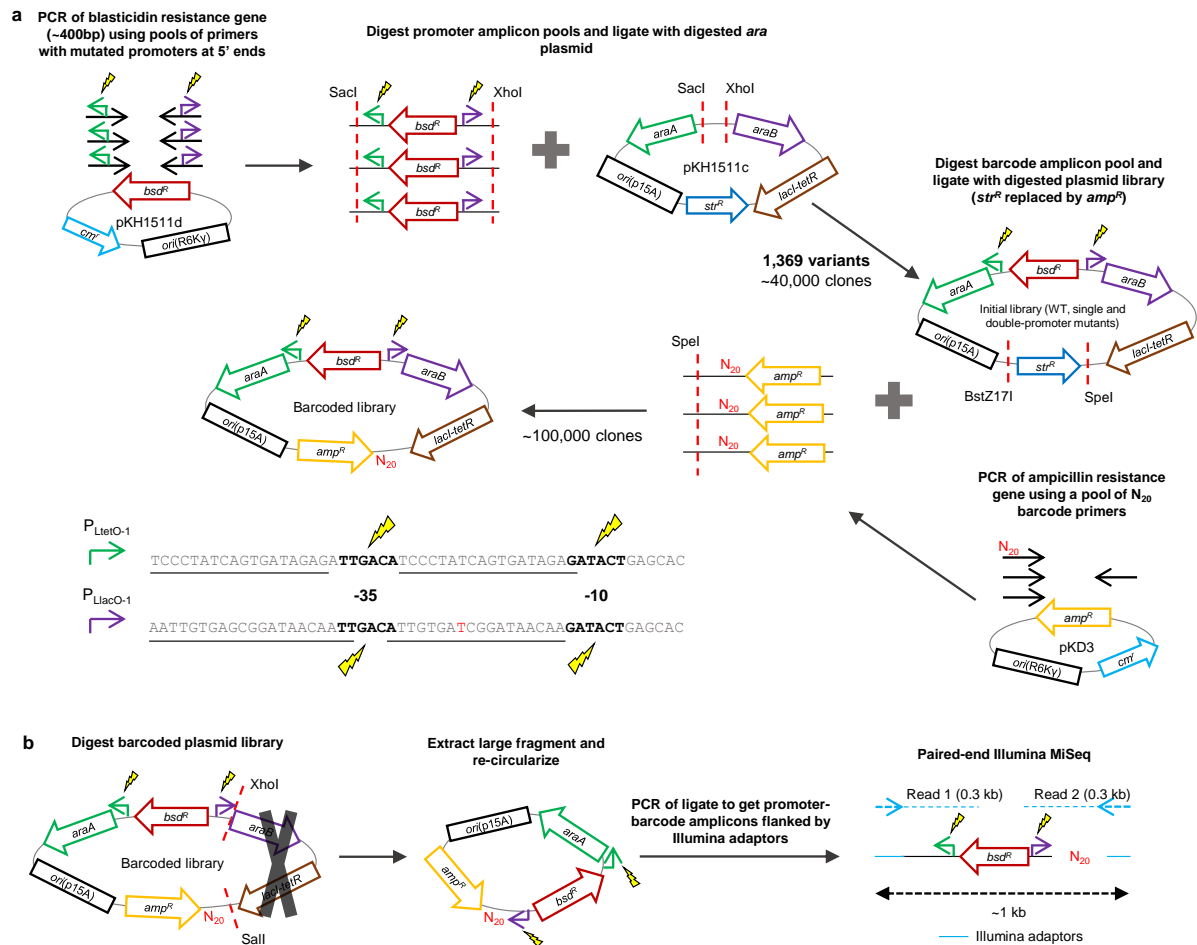

# Extended Data Figure 1. Construction and characterisation of barcoded promoter-mutant plasmid

**library. a,** A blasticidin-resistance cassette (*bsd<sup>R</sup>*) was amplified from pKH1511d using pools of primers carrying variants of the entire *P<sub>LtetO-1</sub>* (green arrow) and *P<sub>LlacO-1</sub>* (purple arrow) promoters at their 5' ends, flanked by *SacI* and *XhoI* restriction sites. The resulting amplicon pool (containing an expected 1,369 promoter variant combinations – see below) was digested with *SacI* and *XhoI* and ligated with a *SacI*-*XhoI* digest of plasmid pKH1511c. ~40,000 colonies were harvested after transformation with this ligate, from which plasmid DNA was then purified, giving an initial plasmid library. An ampicillin-resistance cassette (*amp<sup>R</sup>*) was amplified from pKD3 using for forward priming a pool of primers containing a region of 20 fully randomised nucleotides (the barcode, *N*<sub>20</sub>) at their 5' end, flanked by a *SpeI* restriction site. The resulting amplicon pool was digested with *SpeI* and ligated with a *BstZ17I*-*SpeI* digest of the initial plasmid library (*BstZ17I* creates blunt ends). ~100,000 colonies were harvested after transformation with this ligate, each expected to harbour a plasmid with a unique barcode. Underlined regions of the *P<sub>LtetO-1</sub>* and *P<sub>LlacO-1</sub>* sequences are the repressor binding sites reported in reference<sup>37</sup>. The repressor of *P<sub>LtetO-1</sub>* is TetR, and the repressor of *P<sub>LlacO-1</sub>* is LacI, both encoded on the constant

region of the library plasmid (*lacI-tetR*). The red T in P<sub>LacO-1</sub> differs from the original sequence reported in reference<sup>37</sup>, and was used due to its appearance during an initial adaptation step (this modified sequence still allows titratable control of expression from P<sub>LacO-1</sub> using IPTG, as verified by growth and expression measurements – see Supplementary Table 1). Black letters denote the -35 and -10 RNA-polymerase binding hexamers (note that 1 of the -10 nucleotides in P<sub>LacO-1</sub>, and 3 of the -35 nucleotides in P<sub>LacO-1</sub>, overlap with repressor binding sites). These hexamers were targeted for mutation: over these 12 sites, for each promoter, all 36 possible single-nucleotide substitutions were made, along with the wildtype, and the two sets of promoter variants were comprehensively combined. **b**, To uncover which barcodes were linked to which promoter genotypes, the barcoded plasmid library was first digested with XhoI and SalI to remove the region between the P<sub>LacO-1</sub> and P<sub>LacO-1</sub> promoters and the barcode. The remaining section of the plasmids was re-circularised by ligation under conditions promoting intramolecular ligation. This ligate was used as template for PCR to amplify the newly created promoter-barcode region while adding Illumina adaptors to the amplicon termini. Finally, non-overlapping paired-end Illumina MiSeq sequencing was used to associate barcode sequences with promoter genotypes.

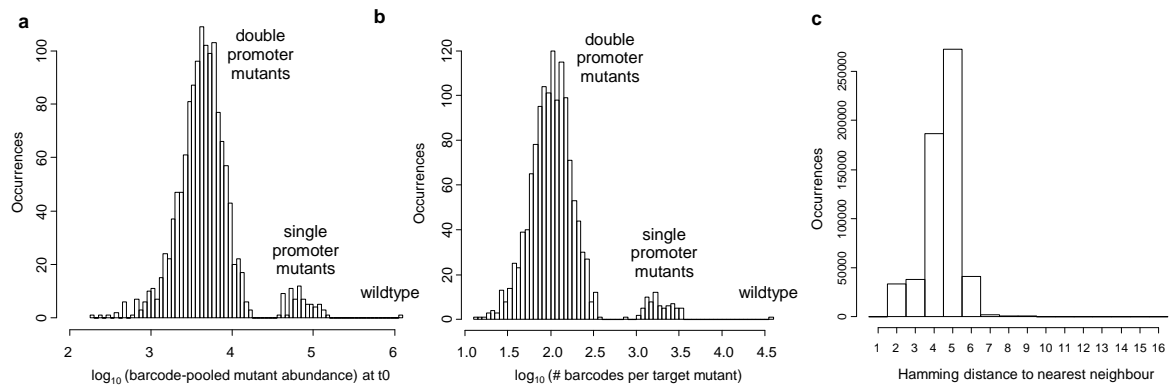

**Extended Data Figure 2. Sequencing coverage and quality of barcoded mutant library.** Data from  $t_0$  of the preliminary competition experiment. **a**, The total coverage (after pooling barcode counts) of each genotype is on the order of  $10^3$  for double mutants,  $10^5$  for single mutants and  $10^6$  for the “wildtype”. These different ranges result directly from the library creation strategy. **b**, The number of unique barcodes associated to each genotype is on the order of  $10^2$  for double mutants,  $10^3$  for single mutants and  $10^4$  for the wildtype. These different ranges also result directly from the library creation strategy. **c**, Over all barcode sequences observed, the mean Hamming distance to a barcode’s nearest neighbor is 4.5. The complete absence of immediately neighbouring sequences is due to the preclustering analysis, in which immediately neighbouring sequences were assumed to be the result of PCR and sequencing errors.



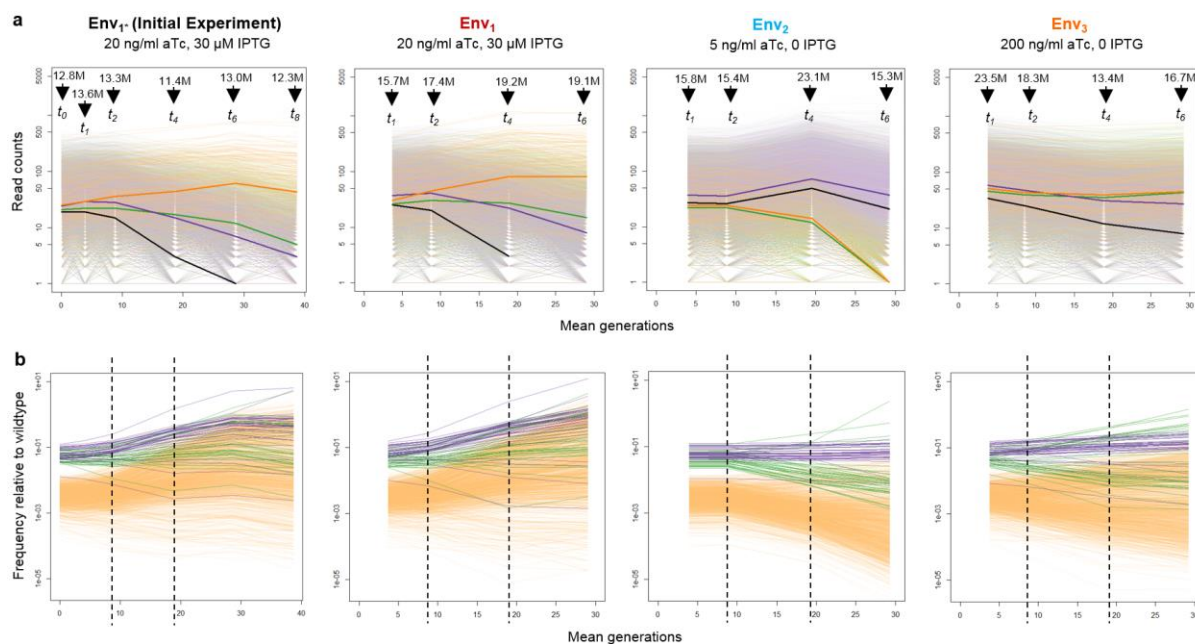

### Extended Data Figure 3. Mutant dynamics during pooled competition assays under different inducer

**concentrations. a**, Example trajectories are shown for all barcodes associated to the wildtype (black), a single  $P_{\text{LacO-1-araA}}$  mutant (green), a single  $P_{\text{LacO-1-araB}}$  mutant (purple) and the resulting double mutant (orange).

Thick lines show median read counts. Numbers are the total number of HiSeq reads obtained at each sampled

time-point. **b**, Barcode-grouped trajectories are shown for all 1,368 mutants relative to the wildtype. Colours as

in **a**. At every time-point, read counts for all barcodes belonging to a particular mutant have been summed and

normalized to WT read counts. Dashed lines indicate time-window chosen for fitness estimation.

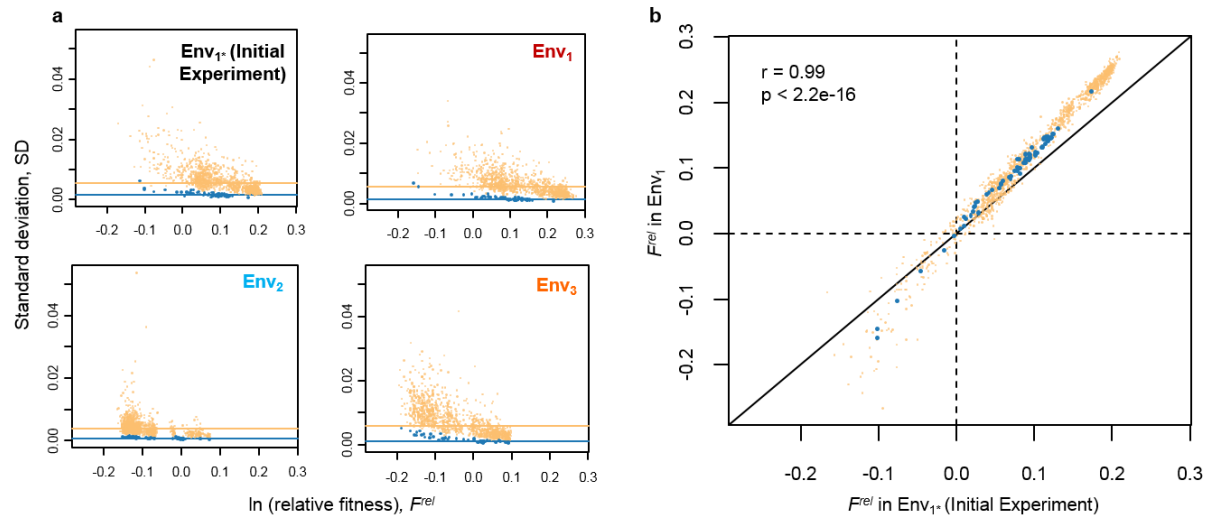

**Extended Data Figure 4. Measurement precision and reproducibility.** **a**, Fitness estimates are plotted against their corresponding bootstrap standard deviations (SD) for the different competition assays. Single mutants (blue) yield more precise estimates as they are associated to more barcodes than double mutants (orange). Precision is lower for less-fit genotypes due to their more rapidly decreasing abundances and so higher counting noise. Lines show median SDs. **b**,  $F^{rel}$  estimates are compared between two replicate experiments (Env<sub>1</sub> conditions; same mutant library stock). Colours as in **a**. Reproducibility is high (Pearson's  $r = 0.99$ ,  $n = 1,344$  mutants), but systematic differences are apparent, most likely due to small differences in media composition.

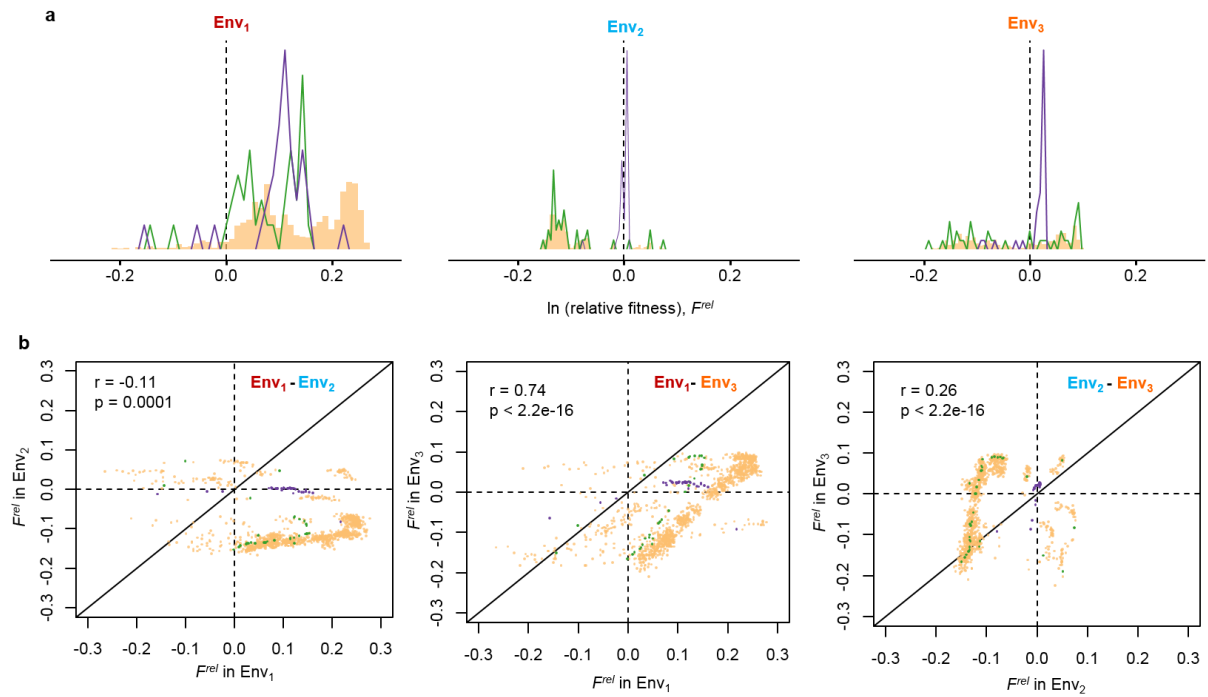

**Extended Data Figure 5. Fitness effects of single and double mutations across environments.** **a**, Density distributions of fitness effects ( $F^{rel}$ ) of single P<sub>LtetO-1</sub>-*araA* mutants (green), single P<sub>LlacO-1</sub>-*araB* mutants (purple) and double mutants (orange). **b**, Correlations between mutant  $F^{rel}$  in different environments range from strongly positive to weakly positive and weakly negative, and can show strong signs of non-monotonicity. Pearson's  $r$  is shown, with  $n = 1,345$ ,  $1,345$  and  $1,366$  mutants, left-right. Colours as in **a**.

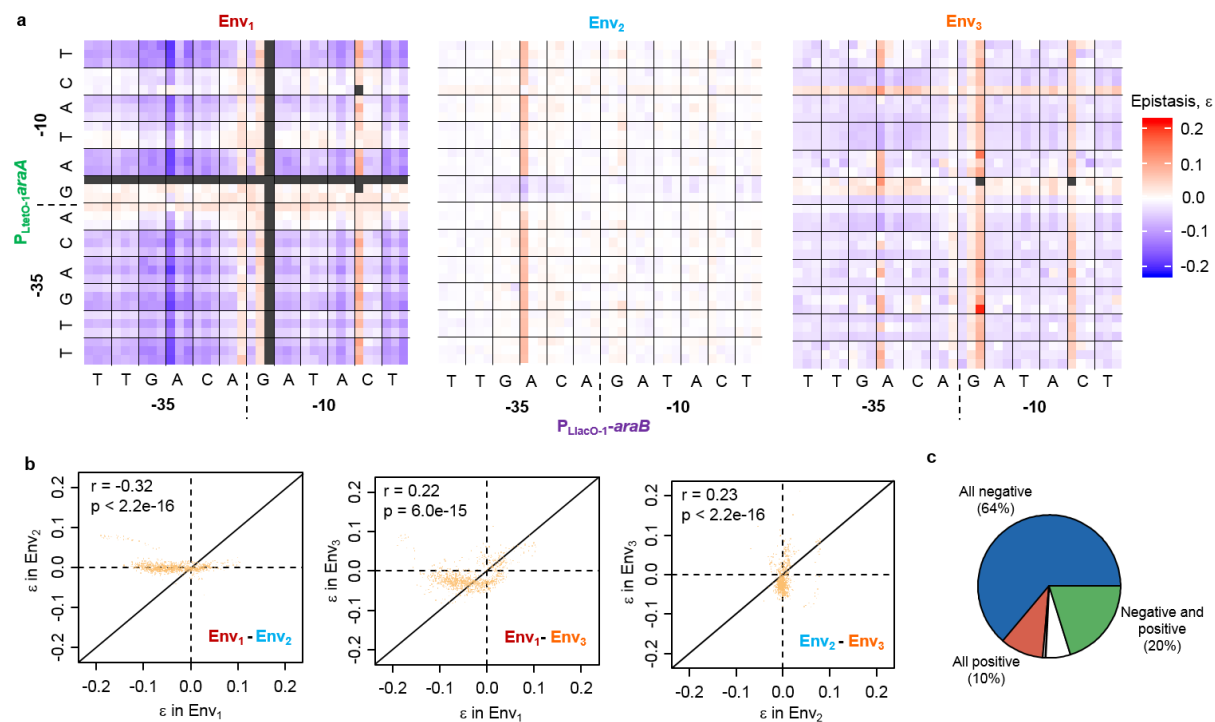

**Extended Data Figure 6. Epistasis across environments.** **a**, Genotype-epistasis maps. “-35” and “-10” denote the RNA polymerase-binding hexamers. Letters show the wildtype base at each position. The three mutants at each position are ordered alphabetically, as in Fig. 2a. Grey denotes incomputable epistasis coefficients. **b**, Correlations between epistasis coefficients in different environments, with Pearson’s  $r$  ( $n = 1,223, 1,223$  and  $1,294$  mutation pairs, left-right). **c**, The fraction of mutation pairs ( $n=1,296$ ) for which, across environments, epistasis can be positive but never negative (red), negative but never positive (blue), or both positive and negative (green). Pairs exhibiting no detectable epistasis in any environment are shown in grey, and those for which epistasis could not be computed in all environments are white.

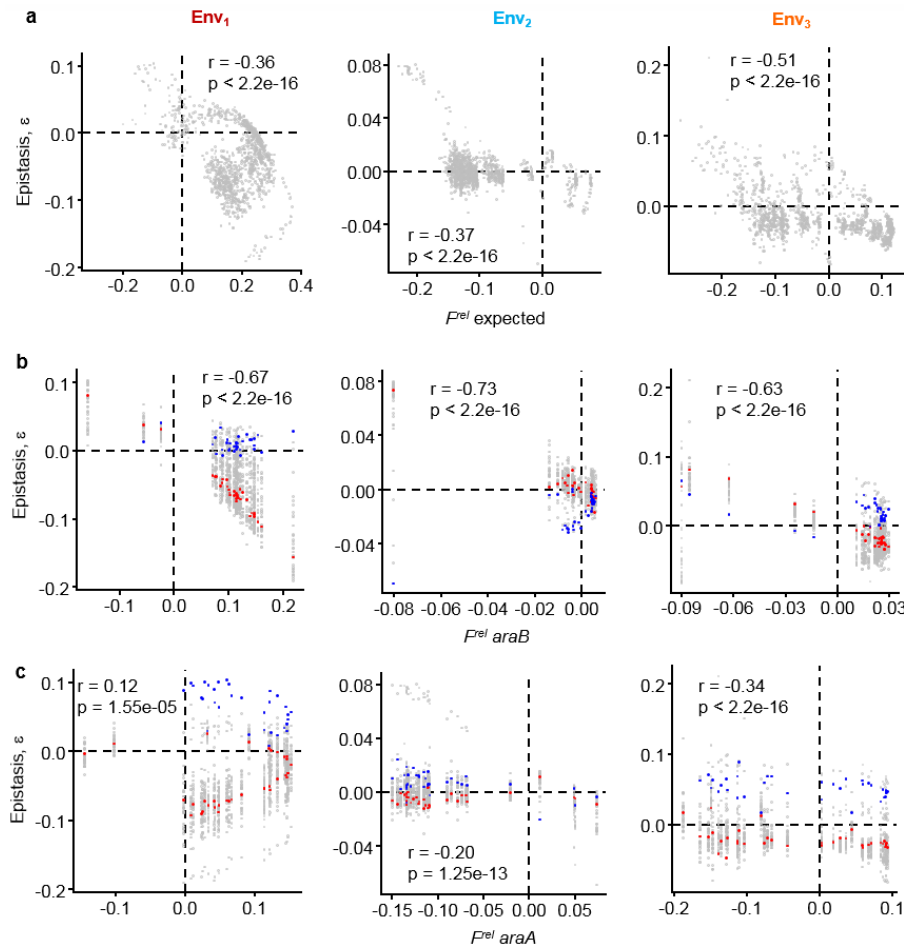

**Extended Data Figure 7. Correlations between individual fitness effects and epistasis. a,** In all environments, the sum of the fitness effects of two individual mutations ( $F^{rel}$  expected) correlates negatively with the epistasis they experience when combined, a trend of diminishing returns and losses (Pearson's  $r$ ,  $n = 1,223, 1,296$  and  $1,294$  mutation pairs,  $Env_{1-3}$ ). The relationship appears complex, however. **b,** When  $P_{LlacO-I^-}$  *araB* is considered alone, the negative correlation between fitness effects and epistasis is stronger, but in  $Env_2$  and  $Env_3$  there is evidence of non-monotonicity (Pearson's  $r$ , number of mutation pairs as for **a**). Different  $P_{LtetO-I^-}$  *araA* alleles can cause different trends within an environment, and the same  $P_{LtetO-I^-}$  *araA* allele can cause different trends across environments (coloured alleles as for Fig. 3b, top panel). **c,** When  $P_{LtetO-I^-}$  *araA* is considered alone, the negative correlation between fitness effects and epistasis is weaker, and in  $Env_1$  it even becomes positive, albeit strongly non-monotonous (Pearson's  $r$ , number of mutation pairs as for **a**). Different  $P_{LlacO-I^-}$  *araB* alleles can cause different trends within an environment, and the same  $P_{LlacO-I^-}$  *araB* allele can cause different trends across environments (coloured alleles as for Fig. 3b, bottom panel).

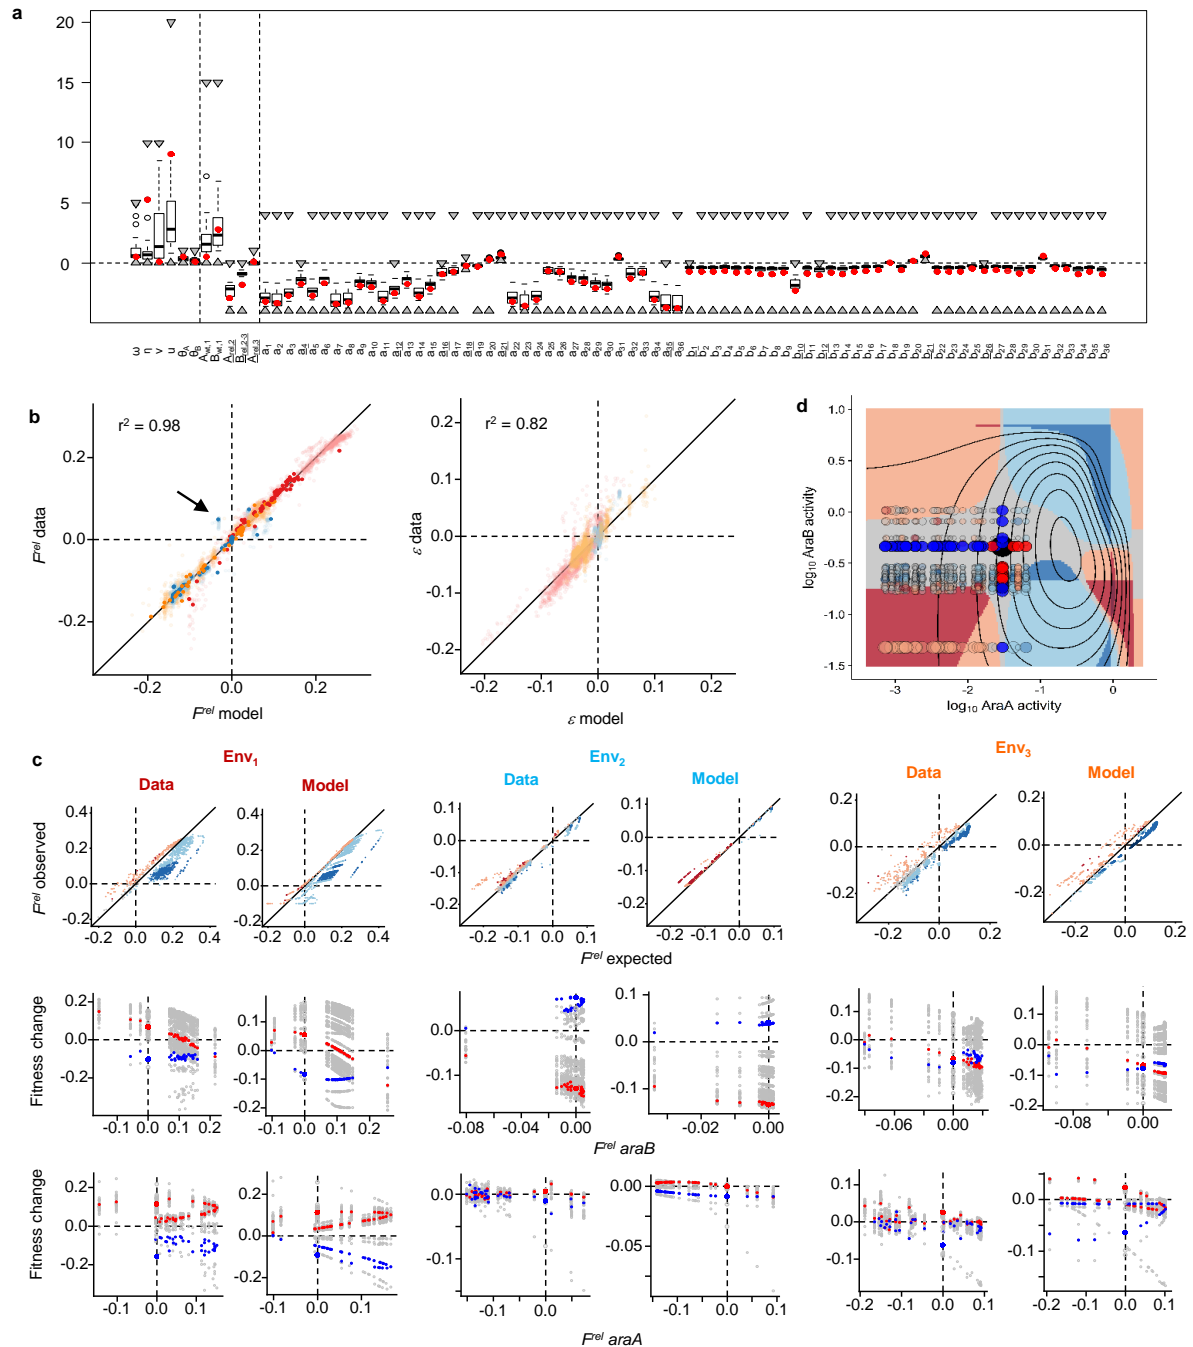

**Extended Data Figure 8. Performance of flux-toxicity-expression burden model. a**, Parameter estimates.

Boxplots show distributions from the best 2.5% of Markov chains ( $n = 800$  chains). Red points show parameter estimates from the best chain. Triangles show bounds of the uniform prior distributions. Parameter descriptions are given in Supplementary Table 7. Vertical dashed lines separate the fitness function parameters, parameters describing wildtype expression levels across environments, and the expression effect (natural logarithm) of mutations (ordered as in Fig. 2b), from left to right. Prior bounds of underlined expression effect parameters were guided by expression measurements. The majority of mutations in both promoters are predicted to

decrease expression (expression effect  $< 0$ ), which is not surprising as the (identical) “wildtype” RNA polymerase-binding sequences are a Hamming distance of only 2 away from the bacterial consensus sequence, indicating near-maximal binding strength. **b**, Correlations between observed values and those predicted by the model. Left – fitness ( $n = 4,079$  mutant measurements); right – epistasis ( $n = 3,813$  mutation pair measurements) ;  $p < 2.2e-16$  for both. Opaque points are single-mutants. Points are coloured by environment, as in Fig. 4a. Arrow points to genotypes containing the qualitative outlier mutation,  $P_{\text{LtetO-1}}\text{-araA G7A}$ . **c**, Comparison of epistatic trends from experimental data and model, across environments. Top row – as for Fig. 3a; lower two rows – as for Fig. 3b (same 4 alleles coloured in all environments). Looping is explained by single-mutants lying on two sides of a phenotypic optimum. **d**, Fitness surface coloured by predicted epistasis category in  $\text{Env}_2$  (as for Fig. 4c). The vast majority of interactions in this environment are predicted, and observed, to be weak (see blue points in **b**, right panel).

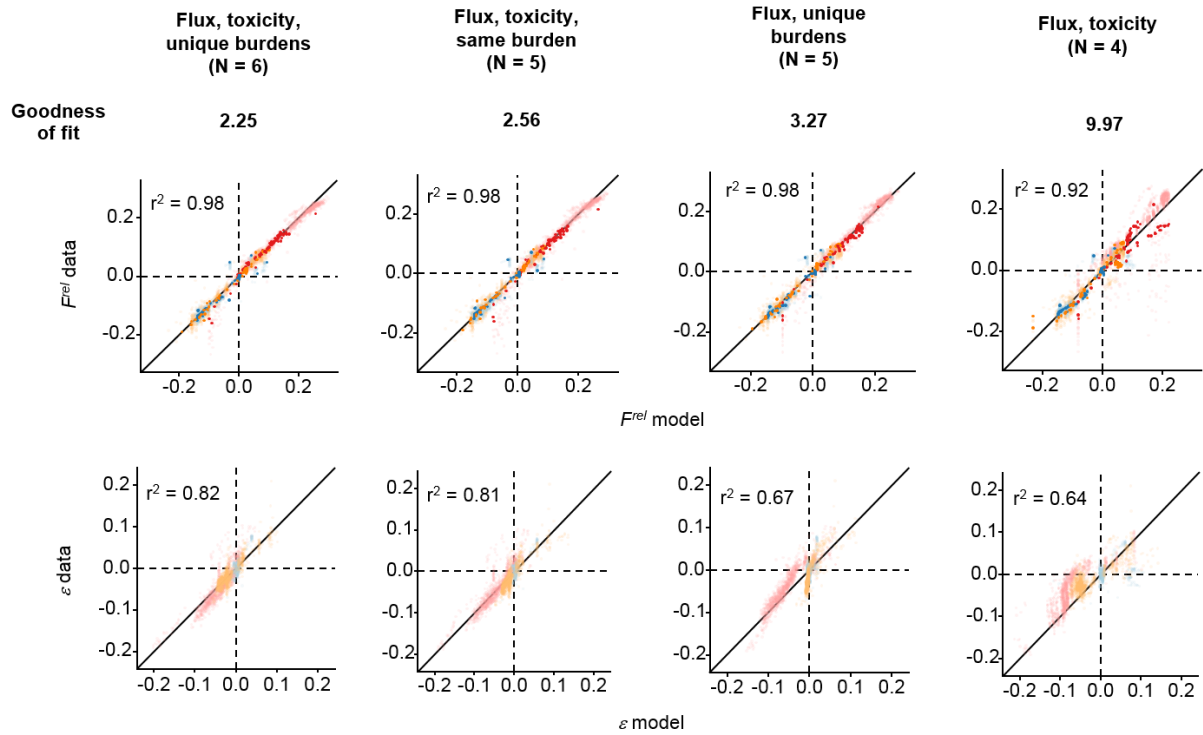

$$F = \left( \omega + u\varphi - \frac{v}{1/\eta - \varphi} \right) (1 - \theta_A A - \theta_B B) \quad F = \left( \omega + u\varphi - \frac{v}{1/\eta - \varphi} \right) (1 - \theta_{AB} A - \theta_{AB} B) \quad F = (\omega + u\varphi) (1 - \theta_A A - \theta_B B) \quad F = \left( \omega + u\varphi - \frac{v}{1/\eta - \varphi} \right)$$

**Extended Data Figure 9. Goodness of fit comparison of different phenotype-fitness models.** Correlations between observed values and those predicted by different model variations. Top row – fitness (n = 4,079 mutant measurements); bottom row – epistasis (n = 3,813 mutation pair measurements);  $p < 2.2e-16$  for all. Opaque points are single-mutants. Points are coloured by environment, as in Fig. 4a. Goodness of fit is calculated as the sum of the squared differences between all observed fitness effects and epistasis coefficients and those predicted by the models (n = 7,892). N is the number of parameters defining the fitness function for each model. From left to right: complete model used in main text; as complete model, except that expression burden per activity unit is the same for both proteins; as complete model, but no toxicity; as complete model, but no expression burden.



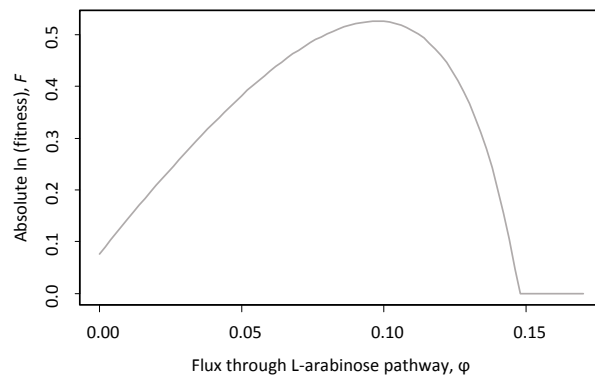

**Extended Data Figure 10. Flux-fitness relationship predicted by model.** The fitted model results in the existence of a particular flux that is optimal for fitness<sup>26,27</sup>. As the flux exceeds this optimum, the rapid accumulation of the toxic intermediate, L-ribulose-5-phosphate, causes a steep fitness decline. The flux-fitness function diverges at very high fluxes (above the predicted range of our dataset), presumably as one or more of the simplifying assumptions underlying the enzyme activity-flux function starts to break down.
